# Supplementary material for: Viral Ejection Proteins: Mosaically Conserved, Conformational Gymnasts
Source: MDPI journal article supplement (doi:10.3390/microorganisms10030504), 2022-02-24
Supplement: s1 [file s1]

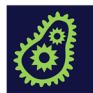

Supplementary materials

Table S1. Gp14-like sequence alignment.

|                                   |                                                               |     |
|-----------------------------------|---------------------------------------------------------------|-----|
| Prochlorococcus_phage_P-SSP7_gp14 | -----MCLGA                                                    | 5   |
| Pseudomonas_phage_phiKMV_gp35     | -----MAFW-----LPLLAAG                                         | 11  |
| Escherichia_phage_K1E_gp34        | MAIGSAVMAGMSSIGSMFAGSGAAAAAGGAGGGLLSLGGFLSGSTAGFSNAGLLGA      | 60  |
| Salmonella_phage_SP6_gp35         | MAIGTALTAGLSSVAGSAAASGGFLSS-LGGAIGAEGVMGSAMSLGGTTGGFSNAGLLSA  | 59  |
| Salmonella_phage_Epsilon_15_gp11  | -----MLYAFKLGR                                                | 9   |
| Shigella_phage_Sf6_gp11           | -----MLYAFKLGR                                                | 9   |
| Escherichia_phage_CUS-3_gp7-like  | -----MLYAFKLGR                                                | 9   |
| Salmonella_phage_P22_gp7          | -----MLYAFKLGR                                                | 9   |
| Salmonella_phage_HK620_gp7        | -----MLYAFKLGR                                                | 9   |
| Escherichia_phage_BA14_gp14       | -----MCWMAAIIPI                                               | 9   |
| Klebsiella_phage_K11_gp14         | -----MCWMAAIIPI                                               | 9   |
| Yersenia_phage_phiYe03-12_gp14    | -----MCWMAAIIPI                                               | 9   |
| Escherichia_phage_T7_gp14         | -----MCWMAAIIPI                                               | 9   |
| Escherichia_phage_13a_gp14        | -----MCWMAAIIPI                                               | 9   |
| Prochlorococcus_phage_P-SSP7_gp14 | AA-----K---AA-----NENARRRYKYENERRERNWMQTMISIYNAQKV---KYDE     | 45  |
| Pseudomonas_phage_phiKMV_gp35     | GMSA---LQQG---LA-----NKEERNKIKAE---KARLKTDLNGLAA-----A-R      | 49  |
| Escherichia_phage_K1E_gp34        | GLQGLGLIGDL---FG-----GSDEAKAMKKAQ---EEQWRQQLIATQEA-----Y-K    | 101 |
| Salmonella_phage_SP6_gp35         | GMQMLNPIDGY---FT-----QKETAKAMKKAQ---DEQWRQQLIATREA-----Y-A    | 100 |
| Salmonella_phage_Epsilon_15_gp11  | KLARGEOPYCAEKGKGGSSSSGAKAARATQYAADLQNNQFNVRVMEQLAPYAAAGLPALQ  | 69  |
| Shigella_phage_Sf6_gp11           | KLARGEOPYCPEKGGKGGSSDKSAKYAAEAQKYAADLQNNQWQTIMKNLAPFTPLAEQYVN | 69  |
| Escherichia_phage_CUS-3_gp7-like  | KLARGEOPYPEKGGKGGSSDKSAKYAAEAQKYAADLQNNQFNTIMNNLKLFTPLAGKYVG  | 69  |
| Salmonella_phage_P22_gp7          | KLARGEOPYPEKGGKGGGA-DKSAKYAAEAQKYAADLQNNQFNTIMNNLKPFTPLADKYTG | 68  |
| Salmonella_phage_HK620_gp7        | KLARGEOPYCPEKGGKGGSSDKSAKYAAEAQKYAADLQNNQFNTIMNNLKPFTPLADKYVG | 69  |
| Escherichia_phage_BA14_gp14       | AMQGAASMIM---GGMQGQE---AKAAQIDQRRQSMQMLKEMNYNE-----ANL        | 52  |
| Klebsiella_phage_K11_gp14         | AMTAVQATG---QSRNEAK-----MIGLQNDQMRQSAQMIKESNIQN-----ANA       | 52  |
| Yersenia_phage_phiYe03-12_gp14    | AMMGAQALS---SQNSADK-----ARVAQTEAGRRQAMEMVKEMNIQN-----ANA      | 52  |
| Escherichia_phage_T7_gp14         | AISGAQAIS---GQNAQAK-----MIAAQTAAGRRQAMEIMRQTNIQN-----ADL      | 52  |
| Escherichia_phage_13a_gp14        | ALAGAQAIS---GQNTQAK-----MIAAQTAAGRRQAMEIMRQTNIQN-----ADL      | 52  |
| Prochlorococcus_phage_P-SSP7_gp14 | DVQNAGLAQAQVKTDQEQAMDRLARGEAIKY-AELFRK-----LLNDS              | 87  |
| Pseudomonas_phage_phiKMV_gp35     | DIANLG-VMA-----ASYRKQAVASQ-VEAKRQ-----G-----MLAGG             | 81  |
| Escherichia_phage_K1E_gp34        | TVADAERSAA-----KQYHADATSNQ-ASLLQ-----QRA                      | 130 |
| Salmonella_phage_SP6_gp35         | SVANAERSAS-----KQYHSELIDNQ-VSLLQ-----QRA                      | 129 |
| Salmonella_phage_Epsilon_15_gp11  | QIQQLSTL-----EGQNSALNQYNSQYKQLADQARYQSLNAAEATGGLGSTATSNQIA    | 124 |
| Shigella_phage_Sf6_gp11           | QLQNLSSL-----EGQGQALNQYNSQYKDLAQARYQSLAAAEATGGLGSTATSNQIA     | 124 |
| Escherichia_phage_CUS-3_gp7-like  | SLENLSSL-----EGQGQALNQYNSQYKDLAQARYQSLAAAEATGGLGSTATSNQIA     | 124 |
| Salmonella_phage_P22_gp7          | SLEGLSSL-----EGQGQALNQYNSQYKDLAQARYQSLNAAEATGGLGSTATSNQIS     | 123 |
| Salmonella_phage_HK620_gp7        | SLENLSSL-----EGQGQALNQYNSQYKDLAQARYQSLAAAEATGGLGSTATSNQIA     | 124 |
| Escherichia_phage_BA14_gp14       | KLESRLDI-----DSTVQEMTQ-----SNMNRVRNMG                         | 79  |
| Klebsiella_phage_K11_gp14         | SLEQKQKL-----EEASSDLTA-----KNLDKQVQAMG                        | 79  |
| Yersenia_phage_phiYe03-12_gp14    | SLEQRDAL-----EASSELTT-----RNMQKVQAMG                          | 79  |
| Escherichia_phage_T7_gp14         | SLQARSKL-----EEASAE LTS-----QNMQKVQAMG                        | 79  |
| Escherichia_phage_13a_gp14        | SLQARSKL-----EEASAE LTS-----QNMQKVQAMG                        | 79  |
| Prochlorococcus_phage_P-SSP7_gp14 | TYG-KLVASGQTGQSTRR--RATMDYAKYGRDVSIDIARRLTLDNR-ELA-----RKSS   | 136 |
| Pseudomonas_phage_phiKMV_gp35     | SAEAQAGAFGVKGASVDA--VALDIEREVEGALIQIDNLDNQMW-NLAEQAHSIQAQK    | 138 |
| Escherichia_phage_K1E_gp34        | QVALLAGATGTGGSNVSS--MLNDLAADGGRNQSTIIDNYENQKI-NFTNQLKSIQGGQ   | 187 |
| Salmonella_phage_SP6_gp35         | QVALLAGASGTGGSNITS--MLNDLTGEAGRNQATIIDNYETQOI-NFANQLKSIQGGQ   | 186 |
| Salmonella_phage_Epsilon_15_gp11  | SIAPTLGQNLWSGQMNYGNLNNVQSAAAGQAS-AGQNYANN-----AGNLA           | 171 |
| Shigella_phage_Sf6_gp11           | TIAPTLGQSWLSNQMSNNYNNLANVGLGALQGQAN-AGQTYANN-----MSSTA        | 171 |
| Escherichia_phage_CUS-3_gp7-like  | TIAPTLGQQLWSGQMNNYNNLANIGLALQGQAN-AGQTYANN-----MSQIS          | 171 |
| Salmonella_phage_P22_gp7          | AIAPTLGQQLWSGQMNNYNNLANIGLALQGQAN-AGQTYANN-----MSQIS          | 170 |
| Salmonella_phage_HK620_gp7        | TIAPTLGQQLWSGQMNNYNNLANIGLALQGQAN-AGQTYANN-----MSQIS          | 171 |
| Escherichia_phage_BA14_gp14       | TIRAAIGEGMLEGSMER--VTRVTEGDFLRESQGLTENYQRDYSVILGKRLANHENTVS   | 137 |
| Klebsiella_phage_K11_gp14         | TIRAAIGEGMLEGASMDR--ISRIIEGKFIREANAVTDNYRRDYASLFAQQLGNSESTID  | 137 |
| Yersenia_phage_phiYe03-12_gp14    | TIRAAIGEGMLEGESMKR--IKRIIEGNYIREANSVTENYRRDYASIFAQQLGRTQSTAS  | 137 |
| Escherichia_phage_T7_gp14         | SIRAAIGESMLEGSSMDR--IKRVTEGQFIREANMVTENYRRDYQAIFAQQLGGTQSAAS  | 137 |
| Escherichia_phage_13a_gp14        | SIRAAIGESMLEGSSMDR--IKRVTEGQFIREANMVTENYRRDYQAIFAQQLGGTQSAAS  | 137 |
| Prochlorococcus_phage_P-SSP7_gp14 | ---EQISKYKQFDEAFKAVAFQIPDVAPPQPMRNVGAEAFMGALSIASNVATMGGQS     | 193 |
| Pseudomonas_phage_phiKMV_gp35     | ---AGLLGQKSTTAGQ-----RSPLV-----AGLMSAGSLYASQYKFGAT            | 176 |
| Escherichia_phage_K1E_gp34        | ---MQMREFK--KPSA----MSTLV-----QGIPSLASAYVTGSKSGKAL            | 223 |
| Salmonella_phage_SP6_gp35         | ---MMMSFE--KPSA----FSAIA-----KGVSGIGEAYLSGHQKGTAL             | 222 |
| Salmonella_phage_Epsilon_15_gp11  | QQMAAIRSQG-SGQST-----LGSAT-----SGGTSGALAGAGIASLL              | 208 |
| Shigella_phage_Sf6_gp11           | QQSAALAAANANKPSS-----LQTAI-----SGGTSGAIGAGIASLL               | 209 |
| Escherichia_phage_CUS-3_gp7-like  | QQSAALAAANANRPSA-----LRQGV-----SGAASGALLGGGIASAL              | 209 |
| Salmonella_phage_P22_gp7          | QQSAALAAANANRPSA-----MQSAI-----GGGASGATAGAGLAKLI              | 208 |
| Salmonella_phage_HK620_gp7        | QQSAALAAANANRPSA-----MQSAI-----GGGASGATAGAGLAKLI              | 209 |
| Escherichia_phage_BA14_gp14       | QIN-EINKSEPKLKGK-----LEQIIDPLGLGL-----TKLVDVATAGSPLTNKL       | 181 |
| Klebsiella_phage_K11_gp14         | QVK-SMQKAEKGKSK-----LEQVLDPLALMT-----SQGASAYSSTA-FDSKG        | 180 |
| Yersenia_phage_phiYe03-12_gp14    | QVD-AMYKSEAKGKSG-----LMRVLDPISMG-----QEAASQYAAAGG-FDKKG       | 180 |
| Escherichia_phage_T7_gp14         | QID-EIYKSEQKQKSK-----LQMVLDPLAIMG-----SSAASAYASGA-FDSKS       | 180 |

|                                   |                                                        |     |
|-----------------------------------|--------------------------------------------------------|-----|
| Escherichia_phage_13a_gp14        | QID-EIYNSEQKQKSK-----LQMLDPLAAMG-----SSAASAYASGA-FDSKS | 180 |
|                                   | :                                                      | :   |
| Prochlorococcus_phage_P-SSP7_gp14 | -----GFGWWGG-----                                      | 200 |
| Pseudomonas_phage_phiKMV_gp35     | -----PKG-----GN----                                    | 181 |
| Escherichia_phage_K1E_gp34        | -----GKALTDSRTYSSGTRGI--                               | 240 |
| Salmonella_phage_SP6_gp35         | -----SKAWSDSRTYSSGTRGV--                               | 239 |
| Salmonella_phage_Epsilon_15_gp11  | GT----STPWGAGIGAGIGLLGSLF                              | 229 |
| Shigella_phage_Sf6_gp11           | ET----STPWGAGIGAGIGLLGSLF                              | 230 |
| Escherichia_phage_CUS-3_gp7-like  | EL----STPWGAGIGAGIGLLGSLF                              | 230 |
| Salmonella_phage_P22_gp7          | GS----STPWGAAIIGGGIGLLGSLF                             | 229 |
| Salmonella_phage_HK620_gp7        | GS----STPWGAAIIGGGIGLLGSLF                             | 230 |
| Escherichia_phage_BA14_gp14       | GKKVASKVKASDAKSTGGQK-----                              | 201 |
| Klebsiella_phage_K11_gp14         | T--K---APISQAQGTKVGGK----                              | 196 |
| Yersenia_phage_phiYe03-12_gp14    | GNQA--APISAAKGTKTGR-----                               | 197 |
| Escherichia_phage_T7_gp14         | TT-K---APIVAAKGTKTGR-----                              | 196 |
| Escherichia_phage_13a_gp14        | TT-K---APIVAAKGTKTGR-----                              | 196 |

Table S2. Gp15-like sequence alignment.

|                                   |                                                               |     |
|-----------------------------------|---------------------------------------------------------------|-----|
| Salmonella_phage_Epsilon_15_gp12  | -----                                                         | 0   |
| Prochlorococcus_phage_P-SSP7_gp15 | -----MTNSFFNFTE-----                                          | 10  |
| Escherichia_phage_BA14_gp15       | -M-----SKLAQALGGMNAPSTS                                       | 17  |
| Escherichia_phage_T7_gp15         | -M-----SKIESAL-QAAQPGLS                                       | 16  |
| Escherichia_phage_13a_gp15        | -M-----SKIESAL-QAAQPGLS                                       | 16  |
| Klebsiella_phage_K11_gp15         | MA-----SKLEQALSQLPQAGST                                       | 18  |
| Yersenia_phage_phiYe03-12_gp15    | MA-----SKLNSVLGNMATPGME                                       | 18  |
| Escherichia_phage_K1E_gp35        | MAIERQAVQGLP-----QVQATS-PNVMTFAPQQVGG-----VEAGVASTSGSR        | 43  |
| Salmonella_phage_SP6_gp36         | MAIERQAVQGLR-----RVQSTGGPSAASFATRQVGV-----Q---ETSASGSR        | 41  |
| Pseudomonas_phage_phiKMV_gp36     | MAESQRASQELGINVGQTQLQPGQSARR-----GV--RDSEVNYSG-PSVGSQ         | 45  |
| Shigella_phage_Sf6_gp12           | MATWQG-----SNGGLLAGIGGVNSNAPSVDIGN-TLQLIRQNNDIERSGANNVGLT     | 52  |
| Salmonella_phage_P22_gp20         | MATWQQ-----GINSGGFLAGIGAQNENAPKARDINA-TLGLIRENNDLARSGANNVALT  | 54  |
| Salmonella_phage_HK620_gp20       | MATWQQ-----GINSGGFLAGIGTQENENAPKASDINA-TLGLIRENNELARSGVNNVGLT | 54  |
| Escherichia_phage_CUS-3_gp20-like | MATWQQ-----GINSGGFLAGIGAQNENAPKASDINA-TLGLIRENNELAQSGANNVGLT  | 54  |
| Salmonella_phage_Epsilon_15_gp12  | -----                                                         | 0   |
| Prochlorococcus_phage_P-SSP7_gp15 | -----APDFAAAIGATYESVNTSYDRREELEQKNDAYRLKN                     | 46  |
| Escherichia_phage_BA14_gp15       | RLRGTG-RVEVKASTVYEDPKYAKKSALIGTVGKLAEMGADAYM-KYDQHQDKADERS-   | 74  |
| Escherichia_phage_T7_gp15         | RLRGGAGGMGYRAATTQ--AEQPRS-SLLDTIGRFKAGADMYT-AKEQRARDLADERS-   | 71  |
| Escherichia_phage_13a_gp15        | RLRGGAGGMGYRAATTQ--AEQPRS-SLLDTIGRFKAGADMYT-AKEQRARDLADERS-   | 71  |
| Klebsiella_phage_K11_gp15         | RIRGGSASMQYRPVTIQ--QEGFRQSNLVQSLAKFGTAVGEAAD-AYDKRQRDKADERS-  | 74  |
| Yersenia_phage_phiYe03-12_gp15    | RLRG-VKGM DYRAATTQ--AEQPRAS-SLLDSIGRFKAGADMYM-AKDERDKQRADERS- | 72  |
| Escherichia_phage_K1E_gp35        | FIEDLI-----RAASSVADVTTGILNQKIEEDKVVMQ-                        | 75  |
| Salmonella_phage_SP6_gp36         | FLEDLV-----NAAGSLATVTTSLNQVRVEDDKVRQY-                        | 73  |
| Pseudomonas_phage_phiKMV_gp36     | ILDGIL-----GAGQ-----QI-----AGKWF-                             | 62  |
| Shigella_phage_Sf6_gp12           | ALQGLS-----GIAG-----VFQEQKQARRQKEF-                           | 76  |
| Salmonella_phage_P22_gp20         | GLRGLA-----GVAD-----IYNQEQQQKALNAF-                           | 78  |
| Salmonella_phage_HK620_gp20       | ALRGLA-----GVAD-----IYNQEQQQKAI SAF-                          | 78  |
| Escherichia_phage_CUS-3_gp20-like | ALRGLA-----GVAD-----IYKQDQQQKAINAF-                           | 78  |
| Salmonella_phage_Epsilon_15_gp12  | -----                                                         | 7   |
| Prochlorococcus_phage_P-SSP7_gp15 | AETLEKLPEEII-KTLPTVKKAVDANKKRREALL-----AKGYEGID               | 88  |
| Escherichia_phage_BA14_gp15       | -----NEIIRKLTPEQR-----                                        | 86  |
| Escherichia_phage_T7_gp15         | -----NEIIRKLTPEQR-----                                        | 83  |
| Escherichia_phage_13a_gp15        | -----NEIIRKLTPEQR-----                                        | 83  |
| Klebsiella_phage_K11_gp15         | -----DEIIRKLTPEQR-----                                        | 86  |
| Yersenia_phage_phiYe03-12_gp15    | -----NEIIRKLTPEQR-----                                        | 84  |
| Escherichia_phage_K1E_gp35        | -----ERAYNGLMPSEDA-----TRGGARANMLVKAQLLANDEAARMKDMATRFQGTG    | 123 |
| Salmonella_phage_SP6_gp36         | -----NRALTGLMPTEDA-----TVGGARAHMLVSLQNDIIAQTMLQSDDAQRFDGDD    | 121 |
| Pseudomonas_phage_phiKMV_gp36     | -----EHNV-----QOE-----VLRGERARMAGEAE-----E-----AVDSNVLAKPFVK  | 97  |
| Shigella_phage_Sf6_gp12           | -----QQAY-----ANA-----YASGDRGALRQLATQYPD-----QIESVRKGMGFI-    | 113 |
| Salmonella_phage_P22_gp20         | -----NQVH-----ANA-----WATGDP SGLFKFAQENPA-----FVAQAQQAFSGL-   | 115 |
| Salmonella_phage_HK620_gp20       | -----NKVH-----ADA-----WASGDP SGLFKFAQENPA-----FVAQAQQAFSGL-   | 115 |
| Escherichia_phage_CUS-3_gp20-like | -----NKVH-----ADA-----WASGDP SGLFKFAQENPA-----FVAQAQQAFSGL-   | 115 |
| Salmonella_phage_Epsilon_15_gp12  | ----DNLSDEEQ--IELLELLEEEENYRN-----                            | 30  |
| Prochlorococcus_phage_P-SSP7_gp15 | ----QELIDKDKESLNTLFNIGKAENFIKNEALKNGDNVTYETIDLSGPH-GTRR----   | 138 |
| Escherichia_phage_BA14_gp15       | ----REAI-----KNGTLLYQD--DPYAMEALKTGRNAAAYLV-----              | 119 |
| Escherichia_phage_T7_gp15         | ----REAL-----NNGTLLYQD--DPYAMEALRVKTGRNAAAYLV-----            | 116 |
| Escherichia_phage_13a_gp15        | ----REAL-----NNGTLLYQD--DPYAMEALRVKTGRNAAAYLV-----            | 116 |
| Klebsiella_phage_K11_gp15         | ----REAI-----KNGTLLYQD--DPYAMEALRFKTGRNAAFLI-----             | 119 |
| Yersenia_phage_phiYe03-12_gp15    | ----RQAI-----QNGTLLYQD--DPYAMQALFKFTGRNAAFLV-----             | 117 |
| Escherichia_phage_K1E_gp35        | DEWTQLMVDSRNEMQNKL FQ--YPELQGDK--DTMRMVTNVFQEQQPQIWATRTQHKL   | 179 |
| Salmonella_phage_SP6_gp36         | SQWEDHVNARMVQDRLDWT--YPELRGDK--ESMRVVTNMFMEQQPKIFAARETAKLK    | 177 |
| Pseudomonas_phage_phiKMV_gp36     | GGWRKQ-----D--YRIAQADFSLKMQRFIANKGREM-----                    | 127 |
| Shigella_phage_Sf6_gp12           | ----DE-----D--QRNSIGTL-----AAGARLAA-S-----                    | 133 |
| Salmonella_phage_P22_gp20         | ----NE-----Q--QRNDMGDL-----AMKANVALSQ-----                    | 136 |
| Salmonella_phage_HK620_gp20       | ----NE-----Q--QRNDMGDL-----AMKANVALSQ-----                    | 136 |
| Escherichia_phage_CUS-3_gp20-like | ----NE-----Q--QRNDMGDL-----AMKANVALSQ-----                    | 136 |

|                                   |                                          |                                           |     |
|-----------------------------------|------------------------------------------|-------------------------------------------|-----|
| Salmonella_phage_Epsilon_15_gp12  | -----TH-----                             | -----LLYEFAPYSK-----                      | 42  |
| Prochlorococcus_phage_P-SSP7_gp15 | --RLMIEEIKQR-----                        | -----LATEFNPWVTKNYPAG                     | 165 |
| Escherichia_phage_BA14_gp15       | -----                                    | -----DDEVAQKVKNGEFRTQEELEEFHRSLQEAAKN     | 152 |
| Escherichia_phage_T7_gp15         | -----                                    | -----DDDDVMQKIKEGVFRTREEMEEYRHSRLQEGAKV   | 149 |
| Escherichia_phage_13a_gp15        | -----                                    | -----DDDDVMQKIKEGVFRTREEMEEYRHSRLQEGAKA   | 149 |
| Klebsiella_phage_K11_gp15         | -----                                    | -----DDEVAQRVQNGEFRTAEEMEEYRHKRLTEGANE    | 152 |
| Yersenia_phage_phiYe03-12_gp15    | -----                                    | -----DDEVQQAIKEGRFRTREEMEEYRHSRLQEHKS     | 150 |
| Escherichia_phage_K1E_gp35        | REQADREDTFDGRVASTWDPNIDPEASGYALQERIREGLT | -QGLLPQEMHKKLVRRAISL                      | 238 |
| Salmonella_phage_SP6_gp36         | QEAEARIKSMESRILLAT                       | -RDVPGEAMGDALNQLQEAMA-MQITKQEFDALVSQLAANR | 235 |
| Pseudomonas_phage_phiK1MV_gp36    | -----                                    | -----TPEEFKRYLSQEATHV                     | 143 |
| Shigella_phage_Sf6_gp12           | -----                                    | -----SPEAMQSWLQNNANEL                     | 149 |
| Salmonella_phage_P22_gp20         | -----                                    | -----GPEAYSKFITDNKDRL                     | 152 |
| Salmonella_phage_HK620_gp20       | -----                                    | -----GPEAYSKFITDNKDRL                     | 152 |
| Escherichia_phage_CUS-3_gp20-like | -----                                    | -----GPEAYSKFITDNKDRL                     | 152 |

|                                   |                                                                  |                                      |     |
|-----------------------------------|------------------------------------------------------------------|--------------------------------------|-----|
| Salmonella_phage_Epsilon_15_gp12  | -----                                                            | -----                                | 42  |
| Prochlorococcus_phage_P-SSP7_gp15 | FNTVQEARLAFDKYKQGI LNNADELGFNL RFTKSQLKDSFNT                     | -----VESTFYETTN                      | 217 |
| Escherichia_phage_BA14_gp15       | YAEQFGIDETDEHYKQGFNSDITER NIALYGAHDNFLSDQAKKGAVINSRVEL           | -----                                | 205 |
| Escherichia_phage_T7_gp15         | YAEQFGIDPEDVDYQRGFN G DITER NISLYGAHDNFLSQQAQKGAIMNSRVEL         | -----                                | 202 |
| Escherichia_phage_13a_gp15        | YAEQFGIDPEDVDYQRGFN G DITER NISLYGAHDNFLSQQAQKGAIMNSRVEL         | -----                                | 202 |
| Klebsiella_phage_K11_gp15         | FAEQFMINPEDESEFQRGFNANITER NISLYGKHDTFLSEQAQKGAILASKVEL          | -----                                | 205 |
| Yersenia_phage_phiYe03-12_gp15    | FAEQFGINEMDEEYQKGFNANITER NIALYGAHDTFLSDQAKKGAILNSKVEL           | -----                                | 203 |
| Escherichia_phage_K1E_gp35        | AQGG-----D--VSMAEALYKVKDDKGVSVAKNPQLITAITSGNAVWARNNVADVTRMSF     | -----                                | 292 |
| Salmonella_phage_SP6_gp36         | AAIG-----D--DSMIQGT KSLKDENGVS LYDRVGQLQTGEIQANRTWAAQNQVALFEK KD | -----                                | 289 |
| Pseudomonas_phage_phiK1MV_gp36    | LDSTEGMNP-----NDALQALAQQQ-----                                   | -----KAEQELFGMQAKAYMDWSIDQAARGFR TQG | 193 |
| Shigella_phage_Sf6_gp12           | A--RVGVDP-----NNVAQMYQQNP-----                                   | -----SGFGEFV--DHLG--M-----AAL-----   | 182 |
| Salmonella_phage_P22_gp20         | N--RVGANP-----DMMIQTGVQNP-----                                   | -----EQLSHML--TTMS--L-----GAL-----   | 185 |
| Salmonella_phage_HK620_gp20       | N--RVGANA--DMMIQTGIQNP-----                                      | -----EQLSHML--TTMS--L-----GAL-----   | 185 |
| Escherichia_phage_CUS-3_gp20-like | N--RVGANA--DMMIQTGIQNP-----                                      | -----EQLSHML--TTMS--L-----GAL-----   | 185 |

|                                   |                                               |                                                     |     |
|-----------------------------------|-----------------------------------------------|-----------------------------------------------------|-----|
| Salmonella_phage_Epsilon_15_gp12  | -----                                         | -----QREFID-----A-----GHDYPE----                    | 55  |
| Prochlorococcus_phage_P-SSP7_gp15 | TAITSKNVLKEQSRMISEVTHALNAEDPLKAFIEASEYNIGYFEG | -----NIAKAE----                                     | 268 |
| Escherichia_phage_BA14_gp15       | -----                                         | -----N-----SVLNDPE--TLRSPHAGEFFENYFSAGLTTGSIPSD--Q  | 242 |
| Escherichia_phage_T7_gp15         | -----                                         | -----N-----GVLQDPD--MLRRPDSADFFEKYIDNGLVTGAIPSDA--Q | 239 |
| Escherichia_phage_13a_gp15        | -----                                         | -----N-----GVLQDPD--MLRRPDSADFFEKYIDNGLVTGAIPSDA--Q | 239 |
| Klebsiella_phage_K11_gp15         | -----                                         | -----S-----GVLKDPA--VLARPESGEFFQRYIDNALKTGSIPSDA--Q | 242 |
| Yersenia_phage_phiYe03-12_gp15    | -----                                         | -----N-----GVLSDPD--LLSRPESGEFFQNYIDNSLVTGMT--DN--Q | 238 |
| Escherichia_phage_K1E_gp35        | EVKESY-----                                   | -----LA-----GDLTD-----                              | 305 |
| Salmonella_phage_SP6_gp36         | AAIKAF-----                                   | -----EA-----GGQ LNR-----                            | 302 |
| Pseudomonas_phage_phiK1MV_gp36    | NSILAKAV--QAQATG--                            | -----DELSR--QSLSEAGLFYTNIMT--SEDIPLVDRDKV           | 240 |
| Shigella_phage_Sf6_gp12           | GPIDYFNV--QDKMAG--                            | -----REIDR--GR LAET-----IR-----S-----NKA            | 213 |
| Salmonella_phage_P22_gp20         | GPEKAFAV--QDKMVG--                            | -----REIDR--GR LAET-----IR-----S-----NKA            | 216 |
| Salmonella_phage_HK620_gp20       | GPEKAFAV--QDKMVG--                            | -----RQEQ--QRINET-----IR-----N-----NDM              | 216 |
| Escherichia_phage_CUS-3_gp20-like | GPEKAFAV--QDKMVG--                            | -----RQEQ--QRINET-----IR-----N-----NDM              | 216 |

|                                   |                                            |                                                   |     |
|-----------------------------------|--------------------------------------------|---------------------------------------------------|-----|
| Salmonella_phage_Epsilon_15_gp12  | -RCFMAG----                                | -NQLG--KSFTG--AA--EVAFHLTGRY--PGTKGYPADGKYGGEWKG  | 100 |
| Prochlorococcus_phage_P-SSP7_gp15 | -RAFINI----                                | -GLMG--TKGS--INIDKFESVLFGEVTA KGDKTRILIDKLG GGE-- | 315 |
| Escherichia_phage_BA14_gp15       | -AFTM--ISQGLSDV--                          | -VNREGGQFLQQIENRKVKLHGKET T-----F--KELMGAEQW      | 290 |
| Escherichia_phage_T7_gp15         | -ATQL--ISQAFSDA--                          | -SSRAGGADFLMRVGDKKVTLNGATTT-----Y--RELIGEEQW      | 287 |
| Escherichia_phage_13a_gp15        | -ATQL--ISQAFSDA--                          | -SSRAGGADFLMRVGDKKVTLNGATTT-----Y--RELIGEEQW      | 287 |
| Klebsiella_phage_K11_gp15         | -AQQV--IIGSLNDV--                          | -IQRPGATNFLQSL EGRPVTLNGKTTT-----Y--KELMGEEQW     | 290 |
| Yersenia_phage_phiYe03-12_gp15    | -AQQV--ISSSLNDV--                          | -LQRPGGAAFLQNIENRKVTLNGATTT-----Y--RELMDGEQW      | 286 |
| Escherichia_phage_K1E_gp35        | -EELLERAQHINN L-----                       | -TGN SVFSNP-----                                  | 327 |
| Salmonella_phage_SP6_gp36         | -EQLLQVMQNHNEI-----                        | -SGGTAWSDS-----                                   | 324 |
| Pseudomonas_phage_phiK1MV_gp36    | -GMQFLAASLDMNQRIYEGLRDAGFLDS--MSFD-----    | -----                                             | 272 |
| Shigella_phage_Sf6_gp12           | -GEALTVRGQDTIQIRGQNI SAQNAALSREIQR AE----- | -----                                             | 246 |
| Salmonella_phage_P22_gp20         | -GEG LQARGQNTMRGQDMSAATARRGQDLATQR-----    | -----                                             | 249 |
| Salmonella_phage_HK620_gp20       | -TNARAIRGQDLSYKAQMARLNH-----               | -DKYVFK-----                                      | 244 |
| Escherichia_phage_CUS-3_gp20-like | -TNARAIRGQDLSYKAQMARLNH-----               | -DKYVFK-----                                      | 244 |

|                                   |       |                                                                      |     |
|-----------------------------------|-------|----------------------------------------------------------------------|-----|
| Salmonella_phage_Epsilon_15_gp12  | ----- | -----KRFYEPVFWIGGETNETV-----                                         | 119 |
| Prochlorococcus_phage_P-SSP7_gp15 | ----- | -----ENRLWAEGVLNEIENAKKGVFENKELNRTNYA--KGF--                         | 350 |
| Escherichia_phage_BA14_gp15       | ----- | -----NNLMVKAQHNEFLNAKKTEAFQLNVNSALNQ--ENVNTGWEQLQSIKAE LDTLPGE--     | 346 |
| Escherichia_phage_T7_gp15         | ----- | -----NALMVTARSQFETDAKLNEQYRLKINSALNQ--EDPRTAW EMLQGIKAE LDKVQPD--    | 343 |
| Escherichia_phage_13a_gp15        | ----- | -----NALMVTARSQFENDAKLNEQYRLKINSALNQ--EDPRTSWEMLQGIKAE LDKVQPD--     | 343 |
| Klebsiella_phage_K11_gp15         | ----- | -----NALMVKASQTQFNDAKLSEGFRLGIT SALNQ--DDTSKGWEMLQGAKE LDRLPGE--     | 346 |
| Yersenia_phage_phiYe03-12_gp15    | ----- | -----QAMMIKAQHTQFQNNAKLTEKFR L DINSALNQ--ADTGKGWETLQGIKAE LDKIQPGE-- | 342 |
| Escherichia_phage_K1E_gp35        | ----- | -----ELEALMRQRAKQNAELGAMQDMRRELYS DRLTGFGQ                           | 363 |
| Salmonella_phage_SP6_gp36         | ----- | -----EIKSLFDRQAKARATS AKLEDLVARGEHGSPLGLQD                           | 360 |
| Pseudomonas_phage_phiK1MV_gp36    | ----- | -----D-----RRALNGLYEKSKAQTRAKESMATLRA--D-----ADF--                   | 303 |
| Shigella_phage_Sf6_gp12           | ----- | -----LQ-----EKALDRQIARES NQLK--L EELKQKQ--ADV--                      | 275 |
| Salmonella_phage_P22_gp20         | ----- | -----AN-----ARTISGSEGNRVVQL-----ADGRT--VSV--                         | 274 |
| Salmonella_phage_HK620_gp20       | ----- | -----QS-----QAALERAGQL-----QDMDV-----LSL--                           | 264 |
| Escherichia_phage_CUS-3_gp20-like | ----- | -----QS-----QAALERAGQL-----QDMDV-----LSL--                           | 264 |

|                                   |       |                                                                    |     |
|-----------------------------------|-------|--------------------------------------------------------------------|-----|
| Salmonella_phage_Epsilon_15_gp12  | ----- | -----TKTTQRILCGRIEEN                                               | 134 |
| Prochlorococcus_phage_P-SSP7_gp15 | ----- | -----VEGI-----QEEENKTN--TRMTKVELARYVTEN                            | 377 |
| Escherichia_phage_BA14_gp15       | ----- | -----EMTPERQALINAQTQM QDRMKRETAELAKQMDKQKSMNKMNVIDAQFQKRLNGQYVSTA  | 406 |
| Escherichia_phage_T7_gp15         | ----- | -----QMTPQREW LISAQEQQNQMNAWTKAQAKALDDSMKSMNKL DVIGKQFQKRINGEWVSTD | 403 |

|                                   |                                                               |     |
|-----------------------------------|---------------------------------------------------------------|-----|
| Escherichia_phage_13a_gp15        | QMTQREWLISAQEQVQNMNAWTKAQAKALDDSMKSMNKLVDIDKQFQKRINGEWVSTD    | 403 |
| Klebsiella_phage_K11_gp15         | QMTPERERLIQAEQMQARFRQEAQAAAKEMDKRQKTINKNQVIDQQFQKRINGQYVSTS   | 406 |
| Yersenia_phage_phiYe03-12_gp15    | EMTPEREWLISAQEQMRTFRKQEQAEATAKLMDKQKTLNKS LVIDKQFQKRLNGEYVSTN | 402 |
| Escherichia_phage_K1E_gp35        | KTDKEKKAYIDVIKQDSQLYAD-----QQIKQRGLDPYSQEAFAIRGAVEVQR         | 411 |
| Salmonella_phage_SP6_gp36         | ISKEDRKAYAGALVDAYTKLAN-----DEITRTG--ATGEEFAAIRGRYEQMR         | 406 |
| Pseudomonas_phage_phiK1MV_gp36    | -----Q-----QRVANGAITDLAEVEAYS RGMVEEGR                        | 330 |
| Shigella_phage_Sf6_gp12           | -----R-----QKADIARADR---QAAA---QGAVDT                         | 296 |
| Salmonella_phage_P22_gp20         | -----G-----GKLGAGANA-----                                     | 285 |
| Salmonella_phage_HK620_gp20       | -----N-----SQIAATGIDPLTGKAATSARMSQAKR                         | 291 |
| Escherichia_phage_CUS-3_gp20-like | -----N-----SQIAATGIDPLTGKAATSARMSQAKR                         | 291 |
| Salmonella_phage_Epsilon_15_gp12  | DEPGYGSIPKEDIISWKSPPFPNLVDHLLVKHHTP-EGVEDGISICYF-----KP---    | 184 |
| Prochlorococcus_phage_P-SSP7_gp15 | WDITQGG---SNLPEFVKNRFAKETGDDILKAELD-YKLDKGIPITEKEVLKLSDPFVE   | 433 |
| Escherichia_phage_BA14_gp15       | YGDMPNTN---ENTGEFTHSDMV-----NYANKKLADIDAMDIPAEQKDRMK          | 449 |
| Escherichia_phage_T7_gp15         | FKDMPVN---ENTGEFKHSDMV-----NYANKKLAEIDSMIDIPDGAKDAMK          | 446 |
| Escherichia_phage_13a_gp15        | FKDMPVN---ENTGEFKHSDMV-----NYANKKLAEIDSMIDIPDAAKDAMK          | 446 |
| Klebsiella_phage_K11_gp15         | YKDMPNTN---ENTGEFTHSDMV-----NYANGKLAEIDQMQLTEQQKDRMK          | 449 |
| Yersenia_phage_phiYe03-12_gp15    | YKDMPNTN---ENTGEFTHSDMV-----NYANQKLAEIEAMDLTPEQKDKLK          | 445 |
| Escherichia_phage_K1E_gp35        | LQFMN-----SKGL---VDDTF-ESRIK-AMES-MLS-PEHFAKGEQ---E           | 448 |
| Salmonella_phage_SP6_gp36         | YAKLG-----QQLI---EDPII-KERYG-SLMQ-LSSANLQDMKIEPE---A          | 444 |
| Pseudomonas_phage_phiK1MV_gp36    | WSDAQAI-----SFMT-----KAMTGLGNAQ---R                           | 352 |
| Shigella_phage_Sf6_gp12           | FSTALDS---LNEIE-----QSPGLSKAV---G                             | 318 |
| Salmonella_phage_P22_gp20         | FYEGIDD---NGNMVVRPASAI---AAPPTSAASAQNYAMK-----KDIDAIANAD---A  | 331 |
| Salmonella_phage_HK620_gp20       | WLDGNNN---YNNALITGERGI-----EKIDSLLGK-----KELEGIGRFE---G       | 330 |
| Escherichia_phage_CUS-3_gp20-like | WLDGNNN---YNNALITGERGI-----EKIDSLLGK-----KELEGIGRFE---G       | 330 |
| Salmonella_phage_Epsilon_15_gp12  | -----YSQG-----RARWQGD-----                                    | 196 |
| Prochlorococcus_phage_P-SSP7_gp15 | AQYLAKVKTGNPLAPSSDFKALAKSQIKGYATVHAKQAGVAPGKESQWNNI VENAEREY  | 493 |
| Escherichia_phage_BA14_gp15       | LDYLRADSEK-----A--FRTAVGELIGDAEKWTS-----                      | 480 |
| Escherichia_phage_T7_gp15         | LKYLQADSKDG-----A--FRTAIGTMVTDAGQEWSA-----                    | 477 |
| Escherichia_phage_13a_gp15        | LKYLQADSKDG-----A--FRTAIGTMVTDAGQEWSA-----                    | 477 |
| Klebsiella_phage_K11_gp15         | LSYLRADSEGG-----A--FRTVVGQLVTDAGSEWSA-----                    | 480 |
| Yersenia_phage_phiYe03-12_gp15    | LDYLRADSEK-----A--FRAAFGEMITDAGNEWQAA-----                    | 476 |
| Escherichia_phage_K1E_gp35        | LMT-----IRQLWEQLPEE-SRGV                                      | 466 |
| Salmonella_phage_SP6_gp36         | LQT-----IMRARDSIPEDARRAV                                      | 463 |
| Pseudomonas_phage_phiK1MV_gp36    | MQGIMAALEAG-----DINALHTLGTNVTEALEQWDMQAAANGSSL                | 393 |
| Shigella_phage_Sf6_gp12           | -----IRSA-----                                                | 322 |
| Salmonella_phage_P22_gp20         | -----SALDFMTGMTGGAGNP-----                                    | 347 |
| Salmonella_phage_HK620_gp20       | -----RNIDGFTSAEGLANRN-----                                    | 346 |
| Escherichia_phage_CUS-3_gp20-like | -----RNIDGFTSAEGLANRN-----                                    | 346 |
| Salmonella_phage_Epsilon_15_gp12  | -----I-----                                                   | 197 |
| Prochlorococcus_phage_P-SSP7_gp15 | P-----LLFAKYMQTADS AVDAHILAKDLESRTNNGVYDNLVNTDKNKIRSVE        | 543 |
| Escherichia_phage_BA14_gp15       | -----VINGKMPEDGGVALN-----A---LRR-----VRNADPELF AALY           | 512 |
| Escherichia_phage_T7_gp15         | -----VINGKLPERT-PAMD-----A---LRR-----IRNADPQLIAALY            | 508 |
| Escherichia_phage_13a_gp15        | -----VINGKLPERT-PAMD-----A---LRR-----IRNADPQLIAALY            | 508 |
| Klebsiella_phage_K11_gp15         | -----VINGKLPEDT-TALN-----K---LRT-----MRNTDPDLFAALY            | 511 |
| Yersenia_phage_phiYe03-12_gp15    | -----VINGKMPEST-PAMD-----N---LRR-----IRNTDPDLIASLY            | 507 |
| Escherichia_phage_K1E_gp35        | -----                                                         | 466 |
| Salmonella_phage_SP6_gp36         | -----                                                         | 463 |
| Pseudomonas_phage_phiK1MV_gp36    | TDRLVQGTQLGLRLGTFPKTYGESVGS AVRMQI---AAK-----EGEANPELVNTLN    | 442 |
| Shigella_phage_Sf6_gp12           | -----FPTVPGSD-----AANFEARLD                                   | 339 |
| Salmonella_phage_P22_gp20         | -----AIGADVRSRLTGKE-----QRQLYNSAQ                             | 370 |
| Salmonella_phage_HK620_gp20       | -----AI-----E                                                 | 349 |
| Escherichia_phage_CUS-3_gp20-like | -----AI-----E                                                 | 349 |
| Salmonella_phage_Epsilon_15_gp12  | -----HGVWFDEEPPYS-----IYG-----EGLT                            | 216 |
| Prochlorococcus_phage_P-SSP7_gp15 | LIKAEH-----IKTIDPNVINTGLIFGTEEVIKEAAELPTGQTHLFYDQLAAKIPGVT    | 597 |
| Escherichia_phage_BA14_gp15       | PDKAEMFLTMDM---MDNQGIDPQILLDADKARQS-----LTKEMQYE-             | 552 |
| Escherichia_phage_T7_gp15         | PDQAEFLTMDM---MDKQGIDPQVILDADRLTVK-----RSKEQRFE-              | 548 |
| Escherichia_phage_13a_gp15        | PDQAEFLTMDM---MDKQGIDPQVILDADRLTAK-----RSKEQRFE-              | 548 |
| Klebsiella_phage_K11_gp15         | PDKADFLTMDM---MDKQGIDPQILIDADRSRRS-----LTKEMQYE-              | 551 |
| Yersenia_phage_phiYe03-12_gp15    | PDKAELFLTMDM---LDNQGIDTQVILDADKSRAQ-----KTKEMQFE-             | 547 |
| Escherichia_phage_K1E_gp35        | -----F-----                                                   | 467 |
| Salmonella_phage_SP6_gp36         | -----M-----                                                   | 464 |
| Pseudomonas_phage_phiK1MV_gp36    | SI----F-EQVASAQEIN---P-SA---GNV-----M---LSGI-                 | 466 |
| Shigella_phage_Sf6_gp12           | TFKAQTF LPMVQSLKGMGALS---DAE-----GKK-----L---SDAV-            | 371 |
| Salmonella_phage_P22_gp20         | RIQGRMNQGVAAARDMGASGINTIAE---AKM-----Y---FQGM-                | 405 |
| Salmonella_phage_HK620_gp20       | ELKSGAFVQNVQTM RGMGSL---NAE-----GQK-----L---ENLI-             | 381 |
| Escherichia_phage_CUS-3_gp20-like | ELKSGAFVQNVQIM RGMGSL---NAE-----GQK-----L---ENLI-             | 381 |
| Salmonella_phage_Epsilon_15_gp12  | R-TNKYGQFSILTFT-----PLMGMSDVVTKFLKNPSKSQKVNMNTIYDAEH          | 262 |
| Prochlorococcus_phage_P-SSP7_gp15 | GAEIQYQVEIYNKMNKLKPKVKSVDVLLAYEKLSP TVQFYLSHHPSPAKVARAKI--EA  | 654 |
| Escherichia_phage_BA14_gp15       | -DDKAWASLKNNSE-----SPELSRMPATLDAGARKIYDSVK                    | 588 |
| Escherichia_phage_T7_gp15         | -DDKAFESALNASK-----APEIARMPASLRESARKIYDSVK                    | 584 |
| Escherichia_phage_13a_gp15        | -DDKAFESALNSST-----APEIARMPASLRESARKIYDSVK                    | 584 |
| Klebsiella_phage_K11_gp15         | -DDKAWASLKNNSE-----SPELSRIPASLDGMARKIYDSVK                    | 587 |
| Yersenia_phage_phiYe03-12_gp15    | -DDRAWAAMMNDK-----NPQIKYMPSSVQGYARKIYDSVK                     | 583 |
| Escherichia_phage_K1E_gp35        | -GDTVNGYMDNYNT-----ALQMGETPLQAARFAR-----                      | 496 |
| Salmonella_phage_SP6_gp36         | -GDKEYAFAENYDL-----ATRMGYTPGQAI EFAQ-----                     | 493 |

|                                   |                                                              |     |
|-----------------------------------|--------------------------------------------------------------|-----|
| Pseudomonas_phage_phiKMV_gp36     | -PEAEQGAVAWALK-----QMKMGIAPAQALR-----E                       | 493 |
| Shigella_phage_Sf6_gp12           | -GALSPKMSEKAFR-----DSIGKIRNQLES-----K                        | 397 |
| Salmonella_phage_P22_gp20         | -PQVDYSSPEAMQ-----QSIREIQEYTNNNYQ-Q                          | 433 |
| Salmonella_phage_HK620_gp20       | -AKLDITQPEEVVR-----KQLSEIR---SQYSV-F                         | 407 |
| Escherichia_phage_CUS-3_gp20-like | -AKLDITQPEEVVR-----KQLSEIR---SQYSV-F                         | 407 |
| Salmonella_phage_Epsilon_15_gp12  | YT-DEQK---EQIIASYPEHEREARARGIPTMGSG-----                     | 293 |
| Prochlorococcus_phage_P-SSP7_gp15 | FK-DDAQIDFDEIDFLP-AAKEALEKTIEDEGAS-----                      | 687 |
| Escherichia_phage_BA14_gp15       | YRTGNADMAMQVDKYLKENTTTLTGDDVDGDTIGVLTNRALRVTDPPDSWKQ-----    | 641 |
| Escherichia_phage_T7_gp15         | YRSGNESMAMEQMTKFLKESTYFTFGDDVDGDTVGVIKNNMMQVNSDPKSWEQ-----   | 637 |
| Escherichia_phage_13a_gp15        | YRSGNESMAMEQMTKFLQESTYFTFGDDVDGDTVGVIKNNMMQVNSDPKSWEQ-----   | 637 |
| Klebsiella_phage_K11_gp15         | YRTGNSDMAMQQTDKFLKESTVTFKGDDVDGDTIGIIPKNILQVSDDPKSWEQ-----   | 640 |
| Yersenia_phage_phiYe03-12_gp15    | YRTGNPDMATEQVAKFLSDSTTTTSSSDVDGDTYGVLKPNILTVSDDPKSWEQ-----   | 636 |
| Escherichia_phage_K1E_gp35        | ---EA---QQKFSRTEKTEKKFNISAIGDALDE-----VSGAGWFD--GKTE-        | 534 |
| Salmonella_phage_SP6_gp36         | ---NA---SRGDKLPGSVMKELNDEVGVVSD-----VASGSWLT--RGDN-          | 531 |
| Pseudomonas_phage_phiKMV_gp36     | F-SANAE-VVKQMDFEKQNTKAFKDNLGKQVNDKFNNN-----IFGRAWNMLTGESDL   | 546 |
| Shigella_phage_Sf6_gp12           | L-S---T-VKKQFDYQEPVQNTPVQ-----Q-                             | 418 |
| Salmonella_phage_P22_gp20         | Y-NVN---VGNGLKSPRQQPDTQQSAGGS-----                           | 459 |
| Salmonella_phage_HK620_gp20       | Q-KVAAR-EAESMGYSYSSGYDTYVSEKSGS-----                         | 436 |
| Escherichia_phage_CUS-3_gp20-like | Q-KVAAR-EAESMGYSYSSGYDTYVSEKSGS-----                         | 436 |
| Salmonella_phage_Epsilon_15_gp12  | -----RIFQI-----PE-E-----T-----                               | 302 |
| Prochlorococcus_phage_P-SSP7_gp15 | -----FILNE-----LDTEEFLELD-----                               | 702 |
| Escherichia_phage_BA14_gp15       | -----GKDII-----DTAAK-----                                    | 651 |
| Escherichia_phage_T7_gp15         | -----GRDIL-----EEARK-----                                    | 647 |
| Escherichia_phage_13a_gp15        | -----GRDIL-----EEARK-----                                    | 647 |
| Klebsiella_phage_K11_gp15         | -----GRDIL-----EEARK-----                                    | 650 |
| Yersenia_phage_phiYe03-12_gp15    | -----GKNIL-----DEAIK-----                                    | 646 |
| Escherichia_phage_K1E_gp35        | -----VSDLGKAIAEELRAKANMLWSSGMRNMDSIKKALITWGNKRYTQSEDAKTSGGY  | 589 |
| Salmonella_phage_SP6_gp36         | -----MSDMGRDLMLEEANQIARSMKVAG-HNNDTIKRHLKSFLQNYQYQLSEGFFTQGV | 585 |
| Pseudomonas_phage_phiKMV_gp36     | SNNEAVLSMYRRATIDEANWLASDRKHAGLLTSDTGREALLEIAAANVRNRTTQVGEGRN | 606 |
| Shigella_phage_Sf6_gp12           | -----                                                        | 418 |
| Salmonella_phage_P22_gp20         | -----                                                        | 459 |
| Salmonella_phage_HK620_gp20       | -----                                                        | 436 |
| Escherichia_phage_CUS-3_gp20-like | -----                                                        | 436 |
| Salmonella_phage_Epsilon_15_gp12  | -----IKCQP-----                                              | 307 |
| Prochlorococcus_phage_P-SSP7_gp15 | -----TEAQE-----                                              | 707 |
| Escherichia_phage_BA14_gp15       | -----KLAETNPWVTNKQLTVFERGDSIYLM-----TTG                      | 681 |
| Escherichia_phage_T7_gp15         | -----GIIASNPWITNKQLTMYSQGDSIYLM-----TTG                      | 677 |
| Escherichia_phage_13a_gp15        | -----GIIASNPWITNKQLTMYSQGDSIYLM-----TTG                      | 677 |
| Klebsiella_phage_K11_gp15         | -----GIIAANPWVTNKQLTMYQQGDSIYMD-----TTG                      | 680 |
| Yersenia_phage_phiYe03-12_gp15    | -----RITEANPWITNKQLTVYQQGDAIYLM-----TTG                      | 676 |
| Escherichia_phage_K1E_gp35        | FIKGDYTSASD-----MLMSVG-----KGVNPTDVPLALGRYVETQMPKELQEWETKD   | 640 |
| Salmonella_phage_SP6_gp36         | LVKGDVRT-----LGDT-----IGANQKDVPVTLRQYLDNHKQALLDASG-GMEEG     | 630 |
| Pseudomonas_phage_phiKMV_gp36     | LKEGDLFSRRDSAPLILPRGTTAEQLFGTND--TETIGTVLAEQHKPHVEGLLG---YKS | 661 |
| Shigella_phage_Sf6_gp12           | -----                                                        | 418 |
| Salmonella_phage_P22_gp20         | -----                                                        | 459 |
| Salmonella_phage_HK620_gp20       | -----                                                        | 436 |
| Escherichia_phage_CUS-3_gp20-like | -----                                                        | 436 |
| Salmonella_phage_Epsilon_15_gp12  | -----                                                        | 307 |
| Prochlorococcus_phage_P-SSP7_gp15 | -----                                                        | 707 |
| Escherichia_phage_BA14_gp15       | QVNIRYDKQ---LLSKMYQE-----NQAKLDEEARNKALKDANKRTLHTRA          | 724 |
| Escherichia_phage_T7_gp15         | QVRVRYDKE---LLSKVWSE-----NQKKLEEKAREKALADVNRKRAPIVAA         | 720 |
| Escherichia_phage_13a_gp15        | QVRVRYDKE---LLSKVWSE-----NQKKLEEKAREKALADVNRKRAPIVAA         | 720 |
| Klebsiella_phage_K11_gp15         | TVRIRYDKE---LLTRTYQE-----QQORLAKEAEEKALKEATKRAPIAAA          | 723 |
| Yersenia_phage_phiYe03-12_gp15    | QVTRFRDQE---LLKREYQR-----TAQMQAEEAREKALKEANKRAPISRV          | 719 |
| Escherichia_phage_K1E_gp35        | DVYIDYNEQKGTFFVIR-AGAAGRPLSGVIPVTSLDTTSLDSAYQKKVEERDKGEYVH-- | 697 |
| Salmonella_phage_SP6_gp36         | DLYFDVDSKRGMTFIR-AGSGRPVPTPAMPLSEIKGQDLLKEHYEKAVKERDEAKKNFEA | 689 |
| Pseudomonas_phage_phiKMV_gp36     | VVAFEYDRTSGLLAVEYDENGVAL-----DRTRVDPQAVGKVLKRNADK            | 707 |
| Shigella_phage_Sf6_gp12           | -----                                                        | 418 |
| Salmonella_phage_P22_gp20         | -----                                                        | 459 |
| Salmonella_phage_HK620_gp20       | -----                                                        | 436 |
| Escherichia_phage_CUS-3_gp20-like | -----                                                        | 436 |
| Salmonella_phage_Epsilon_15_gp12  | -----FECF---DHFY                                             | 315 |
| Prochlorococcus_phage_P-SSP7_gp15 | -----LIMPTPQLGEYN                                            | 719 |
| Escherichia_phage_BA14_gp15       | MNRKR-----EREAKPKRSGSMYDSVSGKILDTLTGKD-----                  | 759 |
| Escherichia_phage_T7_gp15         | TKAREAAAKRVREKRK-QTPKFIYGRKE-----                            | 747 |
| Escherichia_phage_13a_gp15        | TKAREAAAKLVRDKRK-QTPKFIYGRKE-----                            | 747 |
| Klebsiella_phage_K11_gp15         | TQARKAAGERVRAKRK-ATPKFIYGGGDQ-----                           | 751 |
| Yersenia_phage_phiYe03-12_gp15    | PQAREEARKRVQEKRK-KTPKFIYGRKED-----                           | 747 |
| Escherichia_phage_K1E_gp35        | ---P-----YRTDIGAQEPMPAKPTAKDIGKLGLANFLMSSAFASGEN             | 737 |
| Salmonella_phage_SP6_gp36         | NQMR-----MWGAGGYQSPAPEKTTAKTVGSRGIADFLMSPAFAFASGEN           | 732 |
| Pseudomonas_phage_phiKMV_gp36     | -----LNAMRGAEGYANVKVSGTD-----IRMNGGNS--AG                    | 736 |
| Shigella_phage_Sf6_gp12           | -----                                                        | 418 |
| Salmonella_phage_P22_gp20         | -----                                                        | 459 |
| Salmonella_phage_HK620_gp20       | -----                                                        | 436 |
| Escherichia_phage_CUS-3_gp20-like | -----                                                        | 436 |

|                                   |                                                              |     |
|-----------------------------------|--------------------------------------------------------------|-----|
| Salmonella_phage_Epsilon_15_gp12  | VIDAQDFGWNHPQAHQLWMDKADVFYLARVWKKSE-----                     | 352 |
| Prochlorococcus_phage_P-SSP7_gp15 | RAEPVEGNWQKIPNQIGY-----YVYKNGEWQKSGQRGNKLEYKDLIDGYRIDIGYF    | 772 |
| Escherichia_phage_BA14_gp15       | -----                                                        | 759 |
| Escherichia_phage_T7_gp15         | -----                                                        | 747 |
| Escherichia_phage_13a_gp15        | -----                                                        | 747 |
| Klebsiella_phage_K11_gp15         | -----                                                        | 751 |
| Yersenia_phage_phiYe03-12_gp15    | -----                                                        | 747 |
| Escherichia_phage_K1E_gp35        | LPSNFEINYRGNMQQF-----YDKLAMDENK-----DKVGFNKATGTF             | 775 |
| Salmonella_phage_SP6_gp36         | LPSNFEFNYKRNNMDF-----YNYVAKTENG-----ANVGFDVRVAGVY            | 770 |
| Pseudomonas_phage_phiKMV_gp36     | MLKQDVFNWRKELAQF-----EAY-----RG                              | 757 |
| Shigella_phage_Sf6_gp12           | -----                                                        | 418 |
| Salmonella_phage_P22_gp20         | -----                                                        | 459 |
| Salmonella_phage_HK620_gp20       | -----                                                        | 436 |
| Escherichia_phage_CUS-3_gp20-like | -----                                                        | 436 |
|                                   |                                                              |     |
| Salmonella_phage_Epsilon_15_gp12  | -----NTAVQAWGAVKSWANK---IPVAWPHDGHQHEKGGGEQLKTQYAD----A      | 395 |
| Prochlorococcus_phage_P-SSP7_gp15 | KPTFKADPSNPNLGAWKKIPNAIGYFVWDGKEWVRSGQ--KGK-----             | 813 |
| Escherichia_phage_BA14_gp15       | -----                                                        | 759 |
| Escherichia_phage_T7_gp15         | -----                                                        | 747 |
| Escherichia_phage_13a_gp15        | -----                                                        | 747 |
| Klebsiella_phage_K11_gp15         | -----                                                        | 751 |
| Yersenia_phage_phiYe03-12_gp15    | -----                                                        | 747 |
| Escherichia_phage_K1E_gp35        | TPYKDAHGESIGYGHFLTEEEKRDGYIKIGDELVPY----RGSMSQLTESKARALMEQD  | 830 |
| Salmonella_phage_SP6_gp36         | TPYKDAHQSVMGYGHFLTEEEKKNYITIGEDKVPF-----APGQSQLTPERAMRLLEQD  | 825 |
| Pseudomonas_phage_phiKMV_gp36     | EAYKDADGYSVGLGHYLGSGNAGAGTTV-----TPEQAAQWFAED                | 797 |
| Shigella_phage_Sf6_gp12           | -----                                                        | 418 |
| Salmonella_phage_P22_gp20         | -----                                                        | 459 |
| Salmonella_phage_HK620_gp20       | -----                                                        | 436 |
| Escherichia_phage_CUS-3_gp20-like | -----                                                        | 436 |
|                                   |                                                              |     |
| Salmonella_phage_Epsilon_15_gp12  | GFSMLPEHATFPD-----G--G--NSVESGISELRDLMLEG-----RFKVFN         | 433 |
| Prochlorococcus_phage_P-SSP7_gp15 | -----G---EEFEGDIENFRDINLDE-----TIKKVN                        | 837 |
| Escherichia_phage_BA14_gp15       | -----                                                        | 759 |
| Escherichia_phage_T7_gp15         | -----                                                        | 747 |
| Escherichia_phage_13a_gp15        | -----                                                        | 747 |
| Klebsiella_phage_K11_gp15         | -----                                                        | 751 |
| Yersenia_phage_phiYe03-12_gp15    | -----                                                        | 747 |
| Escherichia_phage_K1E_gp35        | ARKHVPPTRDWKIPFDQMHPAQQRGLMDLTYNLGKGGIQNSPRALAAFK-----AGK    | 882 |
| Salmonella_phage_SP6_gp36         | MKSHVPSTKDWAVPFDMHPGVQGRGLMDLSYNLGKDGKINAPKAYAAFK-----AGK    | 877 |
| Pseudomonas_phage_phiKMV_gp36     | TDRLDQGVRLADELGVTTNASILGLAGMAFQMGEGRARQFRNTFQAIKDRNKEAFEAGV  | 857 |
| Shigella_phage_Sf6_gp12           | -----                                                        | 418 |
| Salmonella_phage_P22_gp20         | -----                                                        | 459 |
| Salmonella_phage_HK620_gp20       | -----                                                        | 436 |
| Escherichia_phage_CUS-3_gp20-like | -----                                                        | 436 |
|                                   |                                                              |     |
| Salmonella_phage_Epsilon_15_gp12  | TCEPFFEEFRL-----YHRDENGKIVKTNDLDLATRYGYMMRRFRAR              | 475 |
| Prochlorococcus_phage_P-SSP7_gp15 | -----                                                        | 837 |
| Escherichia_phage_BA14_gp15       | -----                                                        | 759 |
| Escherichia_phage_T7_gp15         | -----                                                        | 747 |
| Escherichia_phage_13a_gp15        | -----                                                        | 747 |
| Klebsiella_phage_K11_gp15         | -----                                                        | 751 |
| Yersenia_phage_phiYe03-12_gp15    | -----                                                        | 747 |
| Escherichia_phage_K1E_gp35        | LTEGFIEMLGTASSEGRKIPGLLKRRAEAYNMAAAG-GVPKITE-VETREDGSMWVKFGG | 940 |
| Salmonella_phage_SP6_gp36         | FTDGFIEMLSTASTEGKRSSGLLVRRAEAYNLAQSGGSVPKISE-VETREDGSMYVKFSG | 936 |
| Pseudomonas_phage_phiKMV_gp36     | RNSKWYTQ-----TPDRAEAFIKRMAPHFDTP-----                        | 884 |
| Shigella_phage_Sf6_gp12           | -----PTTG-----                                               | 422 |
| Salmonella_phage_P22_gp20         | -----YTSK-----                                               | 463 |
| Salmonella_phage_HK620_gp20       | -----DSNK-----                                               | 440 |
| Escherichia_phage_CUS-3_gp20-like | -----DSNK-----                                               | 440 |
|                                   |                                                              |     |
| Salmonella_phage_Epsilon_15_gp12  | MMRDIRKPK--EKKIP-----A-P---IRPVRRGR---                       | 499 |
| Prochlorococcus_phage_P-SSP7_gp15 | -----                                                        | 837 |
| Escherichia_phage_BA14_gp15       | -----                                                        | 759 |
| Escherichia_phage_T7_gp15         | -----                                                        | 747 |
| Escherichia_phage_13a_gp15        | -----                                                        | 747 |
| Klebsiella_phage_K11_gp15         | -----                                                        | 751 |
| Yersenia_phage_phiYe03-12_gp15    | -----                                                        | 747 |
| Escherichia_phage_K1E_gp35        | PMPAGSVSAWTHKRIGADGWYQVYEAAPTCLAKDSKVGVKVL                   | 982 |
| Salmonella_phage_SP6_gp36         | SMSEAFVSKSILGKIGKDGWMEVYPPKAGALASGTVGRIKL                    | 978 |
| Pseudomonas_phage_phiKMV_gp36     | -----SQIG--VDWYSAATAE-----                                   | 898 |
| Shigella_phage_Sf6_gp12           | -----SNFS--SLWGD-----                                        | 431 |
| Salmonella_phage_P22_gp20         | -----SGIK--FTVE-----                                         | 471 |
| Salmonella_phage_HK620_gp20       | -----SGFS--SLWGD-----                                        | 449 |
| Escherichia_phage_CUS-3_gp20-like | -----SGFS--SLWGD-----                                        | 449 |

Table S3. Gp16-like sequence alignment.

|                                   |                                                               |     |
|-----------------------------------|---------------------------------------------------------------|-----|
| Escherichia_phage_BA14_gp16       | MDKYNPNPHEYDALFQQAADTHGVSYGLLRKVGWVESRFKPTAQSPGTGRGMVQFTKAT   | 60  |
| Escherichia_phage_T7_gp16         | MDKYDKNVPSPDYDGLFQKAADANGVSYDLLRKVAWTESRFVPTAKSKTGPLGMMQFTKAT | 60  |
| Escherichia_phage_13a_gp16        | MDKYDKNVPSPDYDGLFQKAADANGVSYDLLRKVAWTESRFVPTAKSKTGPLGMMQFTKAT | 60  |
| Klebsiella_phage_K11_gp16         | -MSYDKSKPSDYDGIQKAADSHGVSYDLLRKLFSNFESSFNPKAVSKTGPKGIMQFTTRNT | 59  |
| Yersenia_phage_phiYe03-12_gp16    | -MSYDKNKPSEFDGLFQKAADKHGVSYDLLRKLAFNESSFNPKAKSPTGPKGLMQFTKGT  | 59  |
| Prochlorococcus_phage_P-SSP7_gp16 | -----MSSDYQIDID---AQA                                         | 13  |
| Escherichia_phage_K1E_gp36        | -----                                                         | 0   |
| Salmonella_phage_SP6_gp37         | -----                                                         | 0   |
| Pseudomonas_phage_phiK16V_gp37    | -----MAKQFKGRMT-PKYPLDQAQLDEAQ                                | 24  |
| Shigella_phage_Sf6_gp13           | -----MAKAWKDVIASPYQ---ALAPEQK                                 | 22  |
| Salmonella_phage_P22_gp16         | -----MK                                                       | 2   |
| Salmonella_phage_HK620_gp16       | -----MAKAWKDVVASPYQ---ALTEEQK                                 | 22  |
| Salmonella_phage_Epsilon_15_gp13  | -----MMK---VTANGK-----                                        | 9   |
| Escherichia_phage_CUS-3_gp16-like | -----MAKAWKDVIASPYQ---ALTEEQK                                 | 22  |
|                                   |                                                               |     |
| Escherichia_phage_BA14_gp16       | GQA-----YGLQN---DEDFTDPAKSIDAGARYLADLVK-KYDGDDELKAALAYNQGE    | 108 |
| Escherichia_phage_T7_gp16         | AKA-----LGLRVTGDPDDRLNPELAINAALKLAGLVG-KFDGDELKAALAYNQGE      | 112 |
| Escherichia_phage_13a_gp16        | AKA-----LGLRVTGDPDDRLNPELAINAALKLAGLVG-KFDGDELKAALAYNQGE      | 112 |
| Klebsiella_phage_K11_gp16         | ARA-----MGLNVTGDDDDGRYNPELAIDAGAKLLASLVK-KYNGDELKAALAYNQGE    | 111 |
| Yersenia_phage_phiYe03-12_gp16    | ATA-----LGLKVTADDDDRYNPELAVDAAARHLSDLIR-KYDGDDELKAALAYNQGE    | 111 |
| Prochlorococcus_phage_P-SSP7_gp16 | IQDSA-----LEFNEIYEENEK-----IEAQKR-----EQEL-                   | 40  |
| Escherichia_phage_K1E_gp36        | -----MEQDIKTNWAG---YVQSTPEPF---SIEAAPVSAPTIRQRN-              | 36  |
| Salmonella_phage_SP6_gp37         | -----MADDISQSWVT---VSQRRLPPT---F-----AQVA-                    | 25  |
| Pseudomonas_phage_phiK16V_gp37    | VQGLDAVPTVGFDALTGGIEGRNVA---AGQRANARELERIVADQEL--PA-LDRA-     | 76  |
| Shigella_phage_Sf6_gp13           | AQAQE-----QYFNEVVAPQAGENAEQ---AKQA-----FYAAYPL--PF-VQSV-      | 61  |
| Salmonella_phage_P22_gp16         | VTANG-----KTFNFPDG--TSTEDIGA---AVDE-----YFAGQAS--AA-ETQP-     | 40  |
| Salmonella_phage_HK620_gp16       | AQAQA-----QYFDEVVAPKAGDKWAE---ARDQ-----FYAA-----              | 52  |
| Salmonella_phage_Epsilon_15_gp13  | ---TF---TFPDGT---STEDIGT---AIDE-----YFAGQAV--QQ-Q-TV-         | 40  |
| Escherichia_phage_CUS-3_gp16-like | AQAQA-----QYFDEVVAPKAGDKWAE---ARDQ-----FYAA-----              | 52  |
|                                   |                                                               |     |
| Escherichia_phage_BA14_gp16       | GRNGKPQLEAYDS-----GNFA-----SIG-DEGRNYLRSLLDVAKSP              | 145 |
| Escherichia_phage_T7_gp16         | GRLGNPQLEAYSK-----GDFA-----SIS-EEGRNYMRNLLDVAKSP              | 149 |
| Escherichia_phage_13a_gp16        | GRLGNPQLEAYSK-----GDFA-----SIS-EEGRNYMRNLLDVAKSP              | 149 |
| Klebsiella_phage_K11_gp16         | GPAGAPQLQAYDK-----GDFG-----SIS-EEGRNYMRKLLDVAKSP              | 148 |
| Yersenia_phage_phiYe03-12_gp16    | GRNGAPQMAYDK-----GDWA-----SIS-EEGRNYMRNLMDVANS                | 148 |
| Prochlorococcus_phage_P-SSP7_gp16 | -LLQQQEQQAQA---EFDDPR---NKEGGGGLRGIS--KEIRSAITGGGLQDTASSIVTLP | 91  |
| Escherichia_phage_K1E_gp36        | -ELQEQLVLEAKADADILGAVGAFFQNEW--LAFGGKRWYDRATA--DFTPPQDFEIQPEQ | 91  |
| Salmonella_phage_SP6_gp37         | -EAERKLEEQRAS---DKVMQTALESEW--ALYGGQRAIERHTT--EFAEQEGYTVPEST  | 77  |
| Pseudomonas_phage_phiK16V_gp37    | -----SAL-----WNQSTLVGRWGDAL---QLDADLA-ANSTGEVDPNFDAGTYG       | 117 |
| Shigella_phage_Sf6_gp13           | -ETQQPVAQQQ-----PQQSGFMSDL-----GEAVKETGRGLVQAGVNVANIP         | 103 |
| Salmonella_phage_P22_gp16         | --AEQQ-EEPQ-----QPEQSLMQRAGDLLTGGQSAGQIAEQAGRGLVNIIPFDVLQGG   | 90  |
| Salmonella_phage_HK620_gp16       | ---YPP-HQQQ-----KEEPSLMQAGDWLTGGQSAGQIAEQAGRGLVNIIPFDVLQGG    | 101 |
| Salmonella_phage_Epsilon_15_gp13  | --NQAN-NAPT-----REEPSLMQAGDWLTGGQSAGQIAEQAGRGLVNIIPFDVLQGG    | 90  |
| Escherichia_phage_CUS-3_gp16-like | ---YPP-PQQQ-----KEEPSLMQAGDWLTGGQSAGQIAEQAGRGLVNIIPFDVLQGG    | 101 |
|                                   |                                                               |     |
| Escherichia_phage_BA14_gp16       | KSGDIESFGGITPKAKGIPFDAAMSGIGKKGVTTTELPEPESHE-----MSFQ-----    | 191 |
| Escherichia_phage_T7_gp16         | MAGQLETFGGITPKKGIPAEVGLAGIGHKQKVTQELPESTS-----FDVK-----       | 195 |
| Escherichia_phage_13a_gp16        | MAGQLETFGGITPKKGIPAEVGLAGIGHKQKVTQELPESTS-----FDVK-----       | 195 |
| Klebsiella_phage_K11_gp16         | NSGALEAFGGITPKKGIPAEADAFKGIKAGKVGTELPESHG-----FDIE-----       | 194 |
| Yersenia_phage_phiYe03-12_gp16    | RKGDLEAFGGITPKAKGIPSGDAFAGIGKKQTVGTDLPESTG-----FKVE-----      | 194 |
| Prochlorococcus_phage_P-SSP7_gp16 | ER-AIDMFSG-----EMVQE-----QQT-----EGYGAEWDD-WF                 | 120 |
| Escherichia_phage_K1E_gp36        | ---REALRF-----KYGTDMQITITEGVRSE---DELNFRIQNADEDL--            | 128 |
| Salmonella_phage_SP6_gp37         | ---KDELSK-----IHGFETIAQDIVKDVKSP---EELQFRMSNAMADK--           | 114 |
| Pseudomonas_phage_phiK16V_gp37    | VQ-AL-----QAAGIQPTDNYLQIMARAGNAKDAAYL                         | 148 |
| Shigella_phage_Sf6_gp13           | AS-VADAVTSAAAWA-----GGKLGIGDGYTHAPRVTTQGLEQDFGLQQG-----       | 148 |
| Salmonella_phage_P22_gp16         | AS-LINAIISQ---G-----LGGPKVLDDVYRPVDRPTDPYAQ-----              | 123 |
| Salmonella_phage_HK620_gp16       | AS-LINAIISQ---G-----LGGPKVLDDVYRPVDRPTDPYAQ-----              | 134 |
| Salmonella_phage_Epsilon_15_gp13  | AS-LINAIISQ---G-----LGGPKVLDDVYRPVDRPTDPYAQ-----              | 123 |
| Escherichia_phage_CUS-3_gp16-like | AS-LINAIISQ---G-----LGGPKVLDDVYRPAERPTDPYAQ-----              | 134 |
|                                   |                                                               |     |
| Escherichia_phage_BA14_gp16       | ---GKEQAAPNQPFQKDYWEAKGTTLDLEANERSTFFGFGNAAEAELS-----         | 235 |
| Escherichia_phage_T7_gp16         | ---GIEQEATAKPFKDFWETHGETLDEYNSRSTFFGFGNAAEAELS-----           | 239 |
| Escherichia_phage_13a_gp16        | ---GIEQEAPAKPFKDFWETHGETLDEYNSRSTFFGFGNAAEAELS-----           | 239 |
| Klebsiella_phage_K11_gp16         | ---GVAQEAPNTPYAKDFWEKTGTTLDYNSRSTFFGFGDAEEAIQI-----           | 238 |
| Yersenia_phage_phiYe03-12_gp16    | ---GKEQKAPNVPYAKDFWEKTGTTDEFNARSTFFGIGDATSAELH-----           | 238 |
| Prochlorococcus_phage_P-SSP7_gp16 | VD---DANPIE---TKTWGGALRSLVHFSGMAAAI-IPAAKVLGVTAASTAVGSLVRG    | 172 |
| Escherichia_phage_K1E_gp36        | ---ERNKRIAQAQWAGSVATIGAAVLDPVGVWASI---PTGGAAKVG---LVGRAVRG    | 177 |
| Salmonella_phage_SP6_gp37         | ---ERSEILARNGTGFSQAQAAGIFDPVGAASMAAPVAGAVKVA---RVGRIIK        | 166 |
| Pseudomonas_phage_phiK16V_gp37    | LSRIQRYEQDEQIVRDNPNWFAAGMLDPAALAVDVTFGAGRALRLG---RA---G       | 199 |
| Shigella_phage_Sf6_gp13           | --ALT---P-QTTEGRVFAEALPYLTPAGVERAAIQAP-TLAGRIA---QGATRLLA     | 195 |
| Salmonella_phage_P22_gp16         | -----AGE---SIGGYLIPG-----AG---VA---G                          | 140 |
| Salmonella_phage_HK620_gp16       | -----AGE---TIGGYLLPIGTAAGAAGAPAKLAGDIG---SA---G               | 167 |
| Salmonella_phage_Epsilon_15_gp13  | -----AGE---AIGGYLLPIGTAAGAAGAPAKLAGDIG---SA---G               | 156 |
| Escherichia_phage_CUS-3_gp16-like | -----AGE---TIGGYLLPIGTAAGAAGATAKLAGDIG---SA---G               | 167 |
|                                   |                                                               |     |
| Escherichia_phage_BA14_gp16       | ---NSTLGVAFRAGKRDNGFDVLTDLVQPTRFNNSHIWTPPEE---LNKIRTEVKNPAYMN | 288 |
| Escherichia_phage_T7_gp16         | ---NSVAGMAFRAGRLDNGFDVFKDITPTRWNNSHIWTPPEE---LEKIRTEVKNPAYIN  | 292 |
| Escherichia_phage_13a_gp16        | ---NSVAGMAFRAGRLDNGFDVFKDITPTRWNNSHIWTPPEE---LEKIRTEVKNPAYIN  | 292 |
| Klebsiella_phage_K11_gp16         | ---NSTLGVAFRAARADDYGVFKDITPTRWNNSVYPSKED---LQKLDSGLPPSYYG     | 291 |

|                                   |                                                               |     |
|-----------------------------------|---------------------------------------------------------------|-----|
| Yersenia_phage_phiYe03-12_gp16    | ---NSVLGVAFRAARSDDGFDLFKDTITPTRWNSHTWTPEE---LERIRKEVKNPSYIN   | 291 |
| Prochlorococcus_phage_P-SSP7_gp16 | AG-VGAVSDVISKYSQEDNGLILRDRFNFDIT--PISTKEHDPAMKTLKNVVEGMIG     | 229 |
| Escherichia_phage_K1E_gp36        | ATAAG-VSNAAI-----ESVLVQGDMDRLDDI                              | 204 |
| Salmonella_phage_SP6_gp37         | AAVAG-AENAAAL-----EAILASGDYQKADDV                             | 193 |
| Pseudomonas_phage_phiKMV_gp37     | MAAAGGAGQVGY-----VAGLDAAGADVDAITY                             | 227 |
| Shigella_phage_Sf6_gp13           | ENAVGSLAA--N-----SAKDDAEALATDLGVG                             | 221 |
| Salmonella_phage_P22_gp16         | NMAIGSVAAEAN-----QQGDFAGNVAKNAVN                              | 168 |
| Salmonella_phage_HK620_gp16       | NMIAGSLADAAN-----QDGDFAQNAAINGGIN                             | 195 |
| Salmonella_phage_Epsilon_15_gp13  | NMIAGSLADAAN-----QEGDFAQNAAINGGIN                             | 184 |
| Escherichia_phage_CUS-3_gp16-like | NMIAGSLADAAN-----QEGDFAQNAAINGGIN                             | 195 |
| .                                 |                                                               |     |
| Escherichia_phage_BA14_gp16       | VVLGGSANLDEL IKMANENFEADAKAAEAGLGAKLSAGLIGAGVDPLTYVPIAGATAKG  | 348 |
| Escherichia_phage_T7_gp16         | VVTGGSPENLDDL IKLANENFENDSRAAEAGLGAKLSAGIIGAGVDPLSYVPMVGTGKG  | 352 |
| Escherichia_phage_13a_gp16        | VVTGGSPENLDDL IKLANENFENDSRAAEAGLGAKLSAGIIGAGVDPLSYVPMVGTGKG  | 352 |
| Klebsiella_phage_K11_gp16         | VVTGGDGENWDAL IKLAKDNFEADQRAAEAGTGAKLAAIGVAGVDPLSYVPLVGVAGKG  | 351 |
| Yersenia_phage_phiYe03-12_gp16    | VVTGGSPENLDAL IKMANDNYEMDARSADAGVGAKLTAGIVGAGVDPLSYVPLVGVAGKG | 351 |
| Prochlorococcus_phage_P-SSP7_gp16 | VVFDGLGIALGKGLRKTK-----INKAGQEV-----VEDG                      | 259 |
| Escherichia_phage_K1E_gp36        | MVALGSGMAMGGVIGAVA--R-----GRATKLSE-QG-----DDR-                | 236 |
| Salmonella_phage_SP6_gp37         | LAAAGFGMIMGGTIGAAAT--R-----ERIARKPGVQG-----VNDG               | 227 |
| Pseudomonas_phage_phiKMV_gp37     | IVAGALGAGVGALLGSGA-----GRIAAEAPTQP--HVPEVSAPTIVG              | 267 |
| Shigella_phage_Sf6_gp13           | VLAGGAINAAGRGLGAAYRGVR-----GAIAPAEQQAII--RF--AEREVGP          | 263 |
| Salmonella_phage_P22_gp16         | LGAQGLLSGAAKLVGRGITAAR-----GEIAPPEARQLI--DT--AESMG--          | 208 |
| Salmonella_phage_HK620_gp16       | IGAQGVLSGVGRVIAPRVSQAL-----GGAALNSANDV--SK--MAKSGTG           | 237 |
| Salmonella_phage_Epsilon_15_gp13  | IGAQGVLSGVGRVIAPRVSQAL-----GGAALNSANDV--SR--MAKSGAG           | 226 |
| Escherichia_phage_CUS-3_gp16-like | IGAQGVLSGVGRVIAPRVSQAL-----GGAALNSANDV--SR--MAKSGAG           | 237 |
| : . :                             |                                                               |     |
| Escherichia_phage_BA14_gp16       | FKLV-----NKALVVGAAQAGMLNV-----ASEGLRTSVAG                     | 378 |
| Escherichia_phage_T7_gp16         | FKLI-----NKALVVGAEASALNV-----ASEGLRTSVAG                      | 382 |
| Escherichia_phage_13a_gp16        | FKLI-----NKALVVGAEASALNI-----ASEGLRTSVAG                      | 382 |
| Klebsiella_phage_K11_gp16         | LKVV-----NKALLVGAQAGALSV-----ASEGIRTSVAG                      | 381 |
| Yersenia_phage_phiYe03-12_gp16    | LKVI-----NKAFVVGTSAGLAI-----ASEGIRTSIAG                       | 381 |
| Prochlorococcus_phage_P-SSP7_gp16 | VSDAVNR-----ATAR--EANVNAQIDEKAALQAQSM-----R--GQY              | 293 |
| Escherichia_phage_K1E_gp36        | -----AASIVRSADAG                                              | 247 |
| Salmonella_phage_SP6_gp37         | AETVDD-----LDTVVKGADEFDAS-----AAKAVREAMEY                     | 259 |
| Pseudomonas_phage_phiKMV_gp37     | LPEVAMT----AEEAAARGFKAGDVVDLLDEGTVLSRIS-----A-RVEQA-          | 308 |
| Shigella_phage_Sf6_gp13           | L-----HTTDLQLQPTRSRVGKMAQTAEINPLAGTSGMRATQ--                  | 299 |
| Salmonella_phage_P22_gp16         | V-----KPMTSDMIKPGNAFTRSLMQGGEG-ALLGTGGKRAEQ--                 | 245 |
| Salmonella_phage_HK620_gp16       | REIARQSANVSDEIAKAADTAGIDINALTPGMRSGSRGLAQAEQ-ILASKPGITQDAHT   | 296 |
| Salmonella_phage_Epsilon_15_gp13  | RQSIASQAANVSDEVAKAAESAGIDINALTPGMRSGSRGIAQAEQ-ALASTPGIVQDAHQ  | 285 |
| Escherichia_phage_CUS-3_gp16-like | RQSIASQAANVSDEVAKAAESAGIDINALTPGMRSGSRGIAQAEQ-ALASTPGIVQDAHQ  | 296 |
|                                   |                                                               |     |
| Escherichia_phage_BA14_gp16       | GDAHYAEA-----ALAGM--                                          | 391 |
| Escherichia_phage_T7_gp16         | GDADYAGA-----ALGGF--                                          | 395 |
| Escherichia_phage_13a_gp16        | GDADYAGA-----ALGGF--                                          | 395 |
| Klebsiella_phage_K11_gp16         | GEAHYADA-----ALGGL--                                          | 394 |
| Yersenia_phage_phiYe03-12_gp16    | GEAHYADA-----ALGGL--                                          | 394 |
| Prochlorococcus_phage_P-SSP7_gp16 | G--GYKNKPISDPWQASP-----NSTGK-AADVYQKQRIDTDWGSQHGW             | 334 |
| Escherichia_phage_K1E_gp36        | D--RYVR-----                                                  | 252 |
| Salmonella_phage_SP6_gp37         | D--AYMAVRSYELPRAKEVDMDVAILSHLDDLKANSSVRMSASEKGKLEQIRQLETEAA   | 317 |
| Pseudomonas_phage_phiKMV_gp37     | -----EI-----PA-----IP-----RRDTAFGDELH                         | 325 |
| Shigella_phage_Sf6_gp13           | -----QEARS-----QL-----VQ-----RFADKFGEYDP                      | 319 |
| Salmonella_phage_P22_gp16         | ----Y-AIRS-----KL-----LG-----DYFDRVGGYNP                      | 265 |
| Salmonella_phage_HK620_gp16       | K--AFSEIES-----K-----FN-----SALDEFGAEAG                       | 318 |
| Salmonella_phage_Epsilon_15_gp13  | A--AFNEISS-----K-----LS-----RNLDEFGAASG                       | 307 |
| Escherichia_phage_CUS-3_gp16-like | A--AFNEISS-----K-----LS-----RNLDEFGAASG                       | 318 |
|                                   |                                                               |     |
| Escherichia_phage_BA14_gp16       | -----LLAGGLTAVADGVAAG-----LR                                  | 409 |
| Escherichia_phage_T7_gp16         | -----VFGAGMSAISDAVAAG-----LK                                  | 413 |
| Escherichia_phage_13a_gp16        | -----LFGAGMSAISDAVAAG-----LK                                  | 413 |
| Klebsiella_phage_K11_gp16         | -----LFGAGMSALSDAVAAG-----IR                                  | 412 |
| Yersenia_phage_phiYe03-12_gp16    | -----LFGAGMSAISDAIAAG-----VR                                  | 412 |
| Prochlorococcus_phage_P-SSP7_gp16 | STDSPFTQRQIENLSESADIAEKEMVELMKPFMSDARIQAEIQGLKSGQSLADKFYDSIR  | 394 |
| Escherichia_phage_K1E_gp36        | -----252                                                      |     |
| Salmonella_phage_SP6_gp37         | T-----IKGKKVDAVAEAAAAAG-----AP-----KSAADRDLDDVK               | 349 |
| Pseudomonas_phage_phiKMV_gp37     | S-----LSGRKLSSEVVDHLKTHA-----E-----                           | 344 |
| Shigella_phage_Sf6_gp13           | A-----V-----VIDSLKAKT-----SG-----IRRAAG-----                  | 338 |
| Salmonella_phage_P22_gp16         | D-----DIVKSMSTSV-----GG-----RKNAAG-----                       | 284 |
| Salmonella_phage_HK620_gp16       | T-----ASE-KSAAIKQRVLASI-----DK-----MKNSEK-----                | 343 |
| Salmonella_phage_Epsilon_15_gp13  | T-----ASE-KSAAIKQRILQNL-----DQ-----MKDAER-----                | 332 |
| Escherichia_phage_CUS-3_gp16-like | T-----ASE-KSAAIKQRILQNL-----DQ-----MKDAER-----                | 343 |
|                                   |                                                               |     |
| Escherichia_phage_BA14_gp16       | KSGA-EQIENPFAAAQMRFEARETARNTGGYDASRM-----                     | 444 |
| Escherichia_phage_T7_gp16         | RSKPEAEFDNEFIGPMMLREARETARNANSADLSRM-----                     | 449 |
| Escherichia_phage_13a_gp16        | RSKPEAEFDNEFIGPMMLREARETARNANSADLSRM-----                     | 449 |
| Klebsiella_phage_K11_gp16         | KARG-VDSVNEFAGPALRMEARETAINTGGHDTSTL-----                     | 447 |
| Yersenia_phage_phiYe03-12_gp16    | RSRG-TEVVNDFAPMAHRLREARETALNSGGEDLTRM-----                    | 447 |
| Prochlorococcus_phage_P-SSP7_gp16 | RAHEVMNGRERLEDIDPDMFAAFDARSOTI---K-----GKKVWQTADVLAADFVIGAL   | 445 |
| Escherichia_phage_K1E_gp36        | -----252                                                      |     |
| Salmonella_phage_SP6_gp37         | KKALARRFDEPLADIQTRLDE---LNAKLARVENVGSKKEELK-----R             | 390 |
| Pseudomonas_phage_phiKMV_gp37     | -----VPKPLQGIAAKV-----ADTLKTLEGLQRTAFRVVQGGDTASS-----A        | 384 |



|                                   |                                                               |     |
|-----------------------------------|---------------------------------------------------------------|-----|
| Shigella_phage_Sf6_gp13           | --NRLEQVQNMAGINIQPARAIQQIDTEISNLQKLGKADVNETISK-----           | 383 |
| Salmonella_phage_P22_gp16         | --AVRDEIVNRMGSAVGTITNSINAIDNTIARLEKLGTSADQRLTLTA-----         | 329 |
| Salmonella_phage_HK620_gp16       | --AAWDSVRSTMPDAKARMSNLNATIQQDI-----LAGMPLTPE-----             | 380 |
| Salmonella_phage_Epsilon_15_gp13  | --AAWDDVRSTMPNQKARMLNGNAVIQAER-----SAGIPLTPE-----             | 369 |
| Escherichia_phage_CUS-3_gp16-like | --AAWDDVRSTMPNQKARMLNGNAVIQAER-----SAGIPLTPE-----             | 380 |
| Escherichia_phage_BA14_gp16       | -----P-----                                                   | 445 |
| Escherichia_phage_T7_gp16         | -----N-----                                                   | 450 |
| Escherichia_phage_13a_gp16        | -----N-----                                                   | 450 |
| Klebsiella_phage_K11_gp16         | -----P-----                                                   | 448 |
| Yersenia_phage_phiYe03-12_gp16    | -----P-----                                                   | 448 |
| Prochlorococcus_phage_P-SSP7_gp16 | FRKARDHGIAGRE-LFEIADLADIDGPAKALYDTLVGAVIQRKIASYTRGMELKNLDVRN  | 504 |
| Escherichia_phage_K1E_gp36        | -----                                                         | 252 |
| Salmonella_phage_SP6_gp37         | FS----NLTREQQI----KELGLDAPARKV-EMTS--AVREALA---AI--RAEKKKT    | 432 |
| Pseudomonas_phage_phikMV_gp37     | FLKPGTAGLHSTQGLDITLVQVRGSTAPGRVGTNPVT--VLHEAVHAATVGV--MNAALRN | 440 |
| Shigella_phage_Sf6_gp13           | -----L--QSYRDELVRNAGPDGPVNLDLKQLS--DLRSQFRMDVKGE--R--PVL      | 426 |
| Salmonella_phage_P22_gp16         | -----L----KN----LKGLNSGNVDFDLLQ--QHRTAFRNTVQGD--A---MVF       | 365 |
| Salmonella_phage_HK620_gp16       | -----M--KQFAS----AYAKTGKNGITFDAMK--AWRSKLADAEQKY--I-----R     | 417 |
| Salmonella_phage_Epsilon_15_gp13  | -----M--KQFVQ----AN---NQGGVTFDGMK--AWRAKFADAEQKY--K-----R     | 403 |
| Escherichia_phage_CUS-3_gp16-like | -----M--KQFVQ----AN---NQGGVTFDGMK--AWRAKFADAEQKY--K-----R     | 414 |
| Escherichia_phage_BA14_gp16       | PSEDRV-----FSQHNGVEYAPLET-----EPGAVVLKDGSIISDTN               | 482 |
| Escherichia_phage_T7_gp16         | TENMKF-----EGEHNGVPYEDLPT-----ERGAVVLHDGSLVSASN               | 487 |
| Escherichia_phage_13a_gp16        | TENMKF-----EGEHNGVPYEDLPT-----ERGAVVLHDGSLVSASN               | 487 |
| Klebsiella_phage_K11_gp16         | PENFSF-----EQDHRGVFPADHPT-----EEGAVVLANGSILSDTN               | 485 |
| Yersenia_phage_phiYe03-12_gp16    | SENRVF-----DREHAGVEYSPLET-----EPGAVVLPQGGIILSDTN              | 485 |
| Prochlorococcus_phage_P-SSP7_gp16 | PANKQA-----                                                   | 510 |
| Escherichia_phage_K1E_gp36        | -----AVADDSIGAMRVKGEE-----VLTEGAFDISSKG                       | 281 |
| Salmonella_phage_SP6_gp37         | PTQTHA-----EAKAQAEVEVRQKRDDSIGAKRVEDSE-----IAGEQFDLSDSM       | 477 |
| Pseudomonas_phage_phikMV_gp37     | PGAMSP----KVAQAMQTLNVRGNVLNALKQDRAAGRQLSEFEETLLAGNSNTLANVK    | 495 |
| Shigella_phage_Sf6_gp13           | PNRSDAAIQ--RVYKAM--TDDINGAIGQNLGNDTLR-----KYQQANAVYADEAA      | 473 |
| Salmonella_phage_P22_gp16         | PNQAKAATN--MVENAM--TRDLRNAVGKSLGPQDAA-----KYLKSNSDFANIYN      | 412 |
| Salmonella_phage_HK620_gp16       | SGEANTARRMAELRDA--TEDMR-----IMAQNGGFLLDDWQ                    | 452 |
| Salmonella_phage_Epsilon_15_gp13  | SGEANAARRAGEIRRAI--TDDMR-----TMAENGGFLLDDWQ                   | 438 |
| Escherichia_phage_CUS-3_gp16-like | SGEANAARRAGEIRRAI--TDDMR-----TMAENGGFLLDDWQ                   | 449 |
| Escherichia_phage_BA14_gp16       | -----LANPMTAKEFAEVDPERAAWGLPMRGL-----                         | 509 |
| Escherichia_phage_T7_gp16         | -----PINPKTLKEFSEVDPEKAARGIKLAGF-----                         | 514 |
| Escherichia_phage_13a_gp16        | -----PINPKTLKEFSEVDPEKAARGIKLAGF-----                         | 514 |
| Klebsiella_phage_K11_gp16         | -----PLNPRTQRDFAEIDPERAAPGKIKLGGF-----                        | 512 |
| Yersenia_phage_phiYe03-12_gp16    | -----PLNPQTLSEFAVNPERAARGISLGGF-----                          | 512 |
| Prochlorococcus_phage_P-SSP7_gp16 | -----                                                         | 510 |
| Escherichia_phage_K1E_gp36        | EDLLKTLQRE-----GNAIDMTPRRWAGTMSALGT-----                      | 311 |
| Salmonella_phage_SP6_gp37         | EDLMDDLARE-----AYQSEVRPVNLKG-LGSVSS-----                      | 506 |
| Pseudomonas_phage_phikMV_gp37     | ELVWGLTDTRFQRTLNRRLRYSDGGPGLWSR--FVEGIRSLGLRSDADTALSRLVAASE   | 553 |
| Shigella_phage_Sf6_gp13           | K--LKN--TRLKNVL--MKG-DLTPVVNNMFLFSKN-----KSEIK                | 507 |
| Salmonella_phage_P22_gp16         | K--VLN--KRISNTLNKARS-EYTPELINTVVFSSR-----K-PSDJK              | 448 |
| Salmonella_phage_HK620_gp16       | K--ANDLSKARFT-AQEQAFAFGRDLATDQVLTNGSKALQGSAAK----SG-TGQFH     | 501 |
| Salmonella_phage_Epsilon_15_gp13  | K--ANDLSKARLS-AQESAES-VFGRDLATDALITNGVSKLQSSSA--KGLNG-PAGFH   | 490 |
| Escherichia_phage_CUS-3_gp16-like | K--ANDLSKARLS-AQESAES-VFGRDLATDALITNGVSKLQSSSA--KGLNG-PAGFH   | 501 |
| Escherichia_phage_BA14_gp16       | -----SEIGLRTL-----RSEHAEIRGLAKD-LVRSPPTGMESGSHGKF             | 546 |
| Escherichia_phage_T7_gp16         | -----TEIGLRTL-----GSSDADIRRVIAID-LVRSPPTGMQSGASGKF            | 551 |
| Escherichia_phage_13a_gp16        | -----TDIGLRTL-----GSSDADIRRVIAID-LVRSPPTGMQSGASGKF            | 551 |
| Klebsiella_phage_K11_gp16         | -----TEIGLRTL-----GSKDAGVRAIAQD-LVRSPPTGMQSGSGKF              | 549 |
| Yersenia_phage_phiYe03-12_gp16    | -----TEIGLRTL-----RSENPVRSIAISD-LVRSPPTGMESGTSKGKF            | 549 |
| Prochlorococcus_phage_P-SSP7_gp16 | -----LKDGNAE-----IE-----KTK--LAYQVAF                          | 530 |
| Escherichia_phage_K1E_gp36        | VVHSSQDA----SVRGLGARLFES-----PQG--LGMQKA-                     | 340 |
| Salmonella_phage_SP6_gp37         | VILNSKNP-----VFRGLGLRLLEN-----AQG--GAYQKG-                    | 535 |
| Pseudomonas_phage_phikMV_gp37     | TIMDAMPGYTKAQAKWANKGAPV-----TEEASLETIVQSTRERAREG--AGFVNRK     | 603 |
| Shigella_phage_Sf6_gp13           | TLYNSVGRVGRQAQMRNGIIG-----KAM-----EKS--GGSPDQF                | 540 |
| Salmonella_phage_P22_gp16         | RIWSSLDNKGK-----DAMR-----AAYISKIAEK-----TGD-----SPAIF         | 481 |
| Salmonella_phage_HK620_gp16       | KIISALPESERAPAIASILQDVTVSQGVRRGKSEGAGIKHIATI--LTPQN--VKAISRY  | 556 |
| Salmonella_phage_Epsilon_15_gp13  | SMIRALPESERVPAISSMLQDAISHGVRRGKSDAAGIHIIAGI--LTPQN--VKAISRY   | 545 |
| Escherichia_phage_CUS-3_gp16-like | SMIRALPESERVPAISSMLQDAISHGVRRGKSDAAGIHIIAGI--LTPQN--VKAISRY   | 556 |
| Escherichia_phage_BA14_gp16       | GAT----ASDIKER-----LHSNNQRTYNLDLYGAM-KEAMADPEW-----           | 581 |
| Escherichia_phage_T7_gp16         | GAT----ASDIHER-----LHGTDQRTYNLDLYKAM-SDAMKDPEF-----           | 586 |
| Escherichia_phage_13a_gp16        | GAT----ASDIHER-----LHGTDQRTYNLDLYKAM-SDAMKDPEF-----           | 586 |
| Klebsiella_phage_K11_gp16         | GAT----ASDIHER-----LHATDQRMYNQLYDAV-DRAMKDPEF-----            | 584 |
| Yersenia_phage_phiYe03-12_gp16    | GAT----ASDIKER-----LHANNQRTYNQLYDAV-RTAMKDPEF-----            | 584 |
| Prochlorococcus_phage_P-SSP7_gp16 | KYAGDNQDDSLFRAYYEA-----VSMNSNDIHNFDFFDAFIKRLKGGELNGKVKTVGLTK  | 585 |
| Escherichia_phage_K1E_gp36        | --S-----ASLMQNTNLNR----LKSADMNRNFNDGFDLWLKEN-----             | 372 |
| Salmonella_phage_SP6_gp37         | --T-----ASILSNVYGNL----IRFAEKNRNYNDGFSQFIKDN-----             | 567 |
| Pseudomonas_phage_phikMV_gp37     | FSE-----ADLLAQPGEGARRLLGLRIDDPVRRDGFSTND-----                 | 638 |
| Shigella_phage_Sf6_gp13           | LRQ----LNLQNTGTI-----TFKG-----                                | 557 |
| Salmonella_phage_P22_gp16         | ITE-----VNKLKAQSGGE-----IYNTIFSG-----                         | 503 |
| Salmonella_phage_HK620_gp16       | SPE-----LGRIASSYGEL----ARAATKPLRYVEQTG-----                   | 585 |
| Salmonella_phage_Epsilon_15_gp13  | SSE-----LGRIADAYGTL----ARAAVKPQQYIERTG-----                   | 574 |
| Escherichia_phage_CUS-3_gp16-like | SSE-----LGRIADAYGTL----ARAAVKPQQYIERTG-----                   | 585 |

```

Escherichia_phage_BA14_gp16 -----SVGM-----FKQGAQGARQEYRRVAIAIER-----PEL      610
Escherichia_phage_T7_gp16 -----STGG-----AKMSREETRYTIYRRAALAIER-----PEL      615
Escherichia_phage_13a_gp16 -----STGG-----AKMSREEARYTIYRRAALAIER-----PEL      615
Klebsiella_phage_K11_gp16 -----SVGE-----QKMSRRAIRQEVYKRASLAIER-----PEL      613
Yersenia_phage_phiYe03-12_gp16 -----STGG-----ATMSRKEIRQEYIKRAALAIER-----PEL      613
Prochlorococcus_phage_P-SSP7_gp16 ELQGVMINSVLSGPKTSVRAIMGTGTATFLRPFQVIG-ATL-----        626
Escherichia_phage_K1E_gp36 -----NINPVAGHTNSHYVQQYNEKVWEAVRIGMDE-----        403
Salmonella_phage_SP6_gp37 -----NLRAVDY-LNPAVTRDFNNQIYTAIVKGIPD-----        597
Pseudomonas_phage_phiKMV_gp37 -----NAASYLRRYRNEF-EGYVKSYDEMMAKAMAEQGVGL-----        673
Shigella_phage_Sf6_gp13 -----QDAAYLKGLKN-----YLQSTQ-----        574
Salmonella_phage_P22_gp16 -----RHMKELDALHD-----VL-----RQTA-----        520
Salmonella_phage_HK620_gp16 -----RSMIPAISTLEK-----GLHPVLESVLSGAF-----        610
Salmonella_phage_Epsilon_15_gp13 -----RTANVLRDLDA-----GLSNVTSTVLNAIA-----        599
Escherichia_phage_CUS-3_gp16-like -----RTANVLRDLDA-----GLSNVTSTVLNAIA-----        610

```

```

Escherichia_phage_BA14_gp16 QANLTKEA--RKVMDIMKEHFDLKREMMENPSM---FGNK-----        645
Escherichia_phage_T7_gp16 QKALTPSE--RIVMDIIRKHFDTKRELMENPAI---FGNTK-----        651
Escherichia_phage_13a_gp16 QKALTPSE--RIVMDIIRKHFDTKRELMENPAI---FGNTK-----        651
Klebsiella_phage_K11_gp16 QADLTKEG--REVMDLLKEHFDTKRELMEQPGI---FGNAN-----        649
Yersenia_phage_phiYe03-12_gp16 QANLTKEG--RNVMNILKQHFDLKREIMENPSI---FGNTK-----        649
Prochlorococcus_phage_P-SSP7_gp16 TGDKTTQRAALAAMSGMM-----ESIPEAWKVFS-----KLNSY      661
Escherichia_phage_K1E_gp36 -----ATPKSIRMAAEGQQAM-----        419
Salmonella_phage_SP6_gp37 -----DTPRGVKLAAEGIADK-----        613
Pseudomonas_phage_phiKMV_gp37 TARALNSRRAMAVRDQLNE---QVTRELLRRDREWTAAGSVRVDPNLPPTIKALADRSDEI      731
Shigella_phage_Sf6_gp13 -----QAAKAAV-----        581
Salmonella_phage_P22_gp16 -----RSDSANV-----        527
Salmonella_phage_HK620_gp16 -----PTAGAI-----        616
Salmonella_phage_Epsilon_15_gp13 -----NSTSGAI-----        606
Escherichia_phage_CUS-3_gp16-like -----NSTSGAI-----        617

```

```

Escherichia_phage_BA14_gp16 -----ANSIFPNSRHKGTYVPHVYSREAKQLYSQALGGSDGLQEAI--ASW-M      691
Escherichia_phage_T7_gp16 -----AVSIFPESRHKGTYVPHVYDRHAKALMIQR-YGAEGLQEGIA--RSW-M      696
Escherichia_phage_13a_gp16 -----AVSIFPESRHKGTYVPHVYDRHAKALMIQR-YGVEGLQEGIA--RSW-M      696
Klebsiella_phage_K11_gp16 -----AVSIFPGSRHKGTYVPNVYDRGAKELMMQKLGPEGLQQAIA--QSW-L      695
Yersenia_phage_phiYe03-12_gp16 -----AVSIFPGSRHKGTYVPNVYDRAIKIEMVKR-YDNDGLQRAIA--ESW-L      694
Prochlorococcus_phage_P-SSP7_gp16 W---SGDISTIKTRFNQVTKGDEQWAMLGDWIENSGKAN--AGDKAAYMANQARALND      715
Escherichia_phage_K1E_gp36 YREALALRQRSGEAGFEKVKADDKYMPDIFDSMKARRQFG-MHDKEDIIEIFS--RAYQN      476
Salmonella_phage_SP6_gp37 LAKSLEIRKAAGEKGFEDVKSARDYIPVIYDGKIVTEAVNRLGSSSEAVIALLS--KGQYT      671
Pseudomonas_phage_phiKMV_gp37 HGLMGQRAREAGVRGFEDFAPRPGYFHRSNWWSKMA-----QMDEAAPGLAR--RAISE      783
Shigella_phage_Sf6_gp13 TTPTGQQ-TIPFII-----GYGTAMN---PAT-----TGAAVSYGLLT--RAYES      620
Salmonella_phage_P22_gp16 VTQTGQALANPVRL-----GAAIPTL---GKS-----LAAEAGYGLAM--RVYES      567
Salmonella_phage_HK620_gp16 AGFSGGGVIGAI-----VGGAG--GATD-----        638
Salmonella_phage_Epsilon_15_gp13 VGGAGGGGIAG-----AAAG-----ALVG-----        624
Escherichia_phage_CUS-3_gp16-like VGGAGGGGIAG-----AAAG-----ALVG-----        635

```

```

Escherichia_phage_BA14_gp16 TSYSRPEVKARVDEHLAETLGID-VKAVTEEMVMKHASDKAYGIAKTDQFNSSVIDDN      750
Escherichia_phage_T7_gp16 NSYVSRPEVKARVDEMLKELHGV---KEVTPPEMVEKYAMDKAYGISHSDQFTNSSIIEN      753
Escherichia_phage_13a_gp16 NSYVSRPDVKARVDEMLKEVHGV---KEVTPPEMVEKYAMDKAYGISHSDQFTNSSIIEN      753
Klebsiella_phage_K11_gp16 TSYSRPEVKARVDEYLMELNGKYSVDQVTPPEVQKHAMDKAYGISHTEDFTASSVIDDN      755
Yersenia_phage_phiYe03-12_gp16 TSYRARPEVKARVDEYLMELNGLKSVHEVTPPEMVQKHAMDKAYGISHTDQFSASSVIDEN      754
Prochlorococcus_phage_P-SSP7_gp16 NKFLT-----YST-----K-----        724
Escherichia_phage_K1E_gp36 ----GARKIPKEVADEIARAQVN---RVVDATLTGRMSFEKAMSGQTKAEYEAIM---R      525
Salmonella_phage_SP6_gp37 ----GKYKMGKKAADALAKVQYI---RASDSTLSSRVAFDRVVSQQQQAQLIEDL---K      720
Pseudomonas_phage_phiKMV_gp37 AVFRGIPGLDRADADTIAQAIQV---RARDRATGIRSEFMGAMGVADTAFIRQAL---E      836
Shigella_phage_Sf6_gp13 EPFRN-----        625
Salmonella_phage_P22_gp16 KPIRN-----        572
Salmonella_phage_HK620_gp16 AIAKG-----        643
Salmonella_phage_Epsilon_15_gp13 AGLKG-----        629
Escherichia_phage_CUS-3_gp16-like AGLKG-----        640

```

```

Escherichia_phage_BA14_gp16 IEGLVGIENNSFLEARNLFD-----SDMPVT----LPNGQQFSVNDLRDFDMKH      795
Escherichia_phage_T7_gp16 IEGLVGIENNSFLEARNLFD-----SDLSIT----MPDGGQQFSVNDLRDFDMFR      798
Escherichia_phage_13a_gp16 IEGLVGIENNSFLEARNLFD-----SDLSIT----MPDGGQQFSVNDLRDFDMFR      798
Klebsiella_phage_K11_gp16 ITGLVGIENNSFLEARNMFD-----SDLPVT----LPDGGSTFSVNDLRDFDMAR      800
Yersenia_phage_phiYe03-12_gp16 IEGLVGIENNNFLEARNMFD-----SDMAVT----LPDGNTFVNDLRTYDMAE      799
Prochlorococcus_phage_P-SSP7_gp16 IMAATDDTFGFLLARSRAKE-----K--AMRLAM-----EQLNKGNGITE      761
Escherichia_phage_K1E_gp36 KAGFSDEEIEKMVEALDNKETKDNISNRAKMSLGLDVTQ---EYNGIRMRDFMNTNVEE      581
Salmonella_phage_SP6_gp37 RAGVPDNIIDNFIEGTELGQEMAESVSNRAKASMGINTQA----EYGGMKVQDLLNTNVGE      776
Pseudomonas_phage_phiKMV_gp37 EANVSQAKFDSIMAKIEQKQSDQGTVKYKGRLSLDMTAEINHNGTVYRVQDLIDRDLDR      896
Shigella_phage_Sf6_gp13 -----        625
Salmonella_phage_P22_gp16 -----        572
Salmonella_phage_HK620_gp16 -----        643
Salmonella_phage_Epsilon_15_gp13 -----        629
Escherichia_phage_CUS-3_gp16-like -----        640

```

```

Escherichia_phage_BA14_gp16 VMPAYDRRVGDIAIMGGTGKTTAELKDAIMALDKKSEGKG-----        836
Escherichia_phage_T7_gp16 IMPAYDRRVNGDIAIMSGTGKTTKELKDEILAKAKAEGDG-----        839
Escherichia_phage_13a_gp16 IMPAYDRRVNGDIAIMSGTGKTTKELKDEILAKAKAEGDG-----        839

```

|                                   |                                                              |      |
|-----------------------------------|--------------------------------------------------------------|------|
| Klebsiella_phage_K11_gp16         | IIPAYDRRVNGDISIMGGSGKTTQQLKDEIMALDKRAERKG-----               | 841  |
| Yersenia_phage_phiYe03-12_gp16    | IIPAYDRRVGDVAIMGGSGKTTKDLKDEIMALDKQSENG-----                 | 840  |
| Prochlorococcus_phage_P-SSP7_gp16 | ITPDLKKNAQDRFY--AQITDADGNITEAATLFAPKEATLTDD-----             | 802  |
| Escherichia_phage_K1E_gp36        | LTDNMKEAAGGAALARQGFSTYQAALNAIDLVERNARNAAKDTK-AHAQFEAESAKIRQ  | 640  |
| Salmonella_phage_SP6_gp37         | LAENYGKEAAGGAALAMGFPTRQSVLNAIDAAERAGRNMAGADAKAIK-----        | 825  |
| Pseudomonas_phage_phiKMV_gp37     | LMENYAGSMSGRSALARAGMPGDSEIEAFIREYQREAAHLGTD-----             | 939  |
| Shigella_phage_Sf6_gp13           | AMLRMANTPRGSTAFKAMQSQKAINALTQGAQS-----                       | 660  |
| Salmonella_phage_P22_gp16         | MLRLANTKPGTPAYERALNQAAATAVRP-----                            | 600  |
| Salmonella_phage_HK620_gp16       | SIAKLSATRSGRYAIEKAVQEATKAVKVGA---SD-----                     | 675  |
| Salmonella_phage_Epsilon_15_gp13  | AVSKIATTRSGRYAIEKAVQEATKAVRAGG---SK-----                     | 661  |
| Escherichia_phage_CUS-3_gp16-like | AVSKIATTRSGRYAIEKAVQEATKAVRAGG---SK-----                     | 672  |
|                                   |                                                              |      |
| Escherichia_phage_BA14_gp16       | -----TMKGEVEALKDVTVKILTGRARRNHD-TVGD                         | 865  |
| Escherichia_phage_T7_gp16         | -----KKTGEVHALMDTVKILTGRARRNQD-TVWE                          | 868  |
| Escherichia_phage_13a_gp16        | -----KKTGEVHALMDTVKILTGRARRNQD-TVWE                          | 868  |
| Klebsiella_phage_K11_gp16         | -----QLKGEVEALKDVTVKILTGRARRNND-TAFE                         | 870  |
| Yersenia_phage_phiYe03-12_gp16    | -----TLKGEVEALKDVTVKILTGRARRNPE-GAWG                         | 869  |
| Prochlorococcus_phage_P-SSP7_gp16 | -----LTGFSKGLNDVFEAAPWAKPFFLFA                               | 827  |
| Escherichia_phage_K1E_gp36        | SEPDYKKAQEKIEELKKRLKLEKDEAAGLAIDEEIRQMREGLRLIMGKSIDADPQALST  | 700  |
| Salmonella_phage_SP6_gp37         | -----QLRAESEMLRDSVKLIYGNITIDANPNAGIV                         | 855  |
| Pseudomonas_phage_phiKMV_gp37     | -----KVQELTGQLRGVFGDFTGNVPREH---QLG                          | 966  |
| Shigella_phage_Sf6_gp13           | -----DALSE-----                                              | 665  |
| Salmonella_phage_P22_gp16         | -----LLANEATRQ-----                                          | 609  |
| Salmonella_phage_HK620_gp16       | -----GSLAAAEERRFMANKAAVK---AI-                               | 695  |
| Salmonella_phage_Epsilon_15_gp13  | -----EALAAAEERRFMANKAAVK---AI-                               | 681  |
| Escherichia_phage_CUS-3_gp16-like | -----EALAAAEERRFMANKAAVK---AI-                               | 692  |
|                                   |                                                              |      |
| Escherichia_phage_BA14_gp16       | TMF-----R-----ALSDMSFFTKNAYMGLQNLTEI-SGLLAKG                 | 898  |
| Escherichia_phage_T7_gp16         | TSL-----R-----AINDLGFFAKNAYMGAQNITEI-AGMIVTG                 | 901  |
| Escherichia_phage_13a_gp16        | TSL-----R-----SINDLGFFAKNAYMGAQNITEI-AGMIVTG                 | 901  |
| Klebsiella_phage_K11_gp16         | TAM-----R-----TLNDLAFFAKNFYMGPNLTEI-AGMLAKG                  | 903  |
| Yersenia_phage_phiYe03-12_gp16    | TAL-----R-----SVNDLTFFAKNAYMGAQNITEI-AGMLAKG                 | 902  |
| Prochlorococcus_phage_P-SSP7_gp16 | RTGVNGLSLTAKHTPGFNFLVKEWNEIAFADPSNLSGLQRYGIETAEDLANAKALQVGR  | 887  |
| Escherichia_phage_K1E_gp36        | KMLR-----RGRDITGVLRRLGQMGAQLGEL-ANFMGEF                      | 733  |
| Salmonella_phage_SP6_gp37         | RGTR-----RVREITGLRLRLGQMGAQVPEL-ARAITKM                      | 888  |
| Pseudomonas_phage_phiKMV_gp37     | PVAQ-----RASGLTSATMLGFSGVYQLAEL-ATMAHRQ                      | 999  |
| Shigella_phage_Sf6_gp13           | -----                                                        | 665  |
| Salmonella_phage_P22_gp16         | -----RDALGNEEFQRL-----SRA                                    | 710  |
| Salmonella_phage_HK620_gp16       | -----RDAVGNEEFNRL-----ARA                                    | 696  |
| Salmonella_phage_Epsilon_15_gp13  | -----RDAVGNEEFNRL-----ARA                                    | 707  |
| Escherichia_phage_CUS-3_gp16-like | -----RDAVGNEEFNRL-----ARA                                    | 707  |
|                                   |                                                              |      |
| Escherichia_phage_BA14_gp16       | NTRAMLHGIPALRD---LAF-----RNKPVSGKELKELHSMVFGKEFDDLIRPARQ     | 946  |
| Escherichia_phage_T7_gp16         | NVRALGHGIPILRD---TLY-----KSKPVSAKELKELHASLFGKEVDQLIRPKRA     | 949  |
| Escherichia_phage_13a_gp16        | NVRALSHGIPILRD---TLY-----KSKPVSAKELKELHASLFGKEVDQLIRPKRA     | 949  |
| Klebsiella_phage_K11_gp16         | NVKAHLHGIPILRD---LAT-----RTSPVSGSELRELHGALFGKELDQLIRPGRE     | 951  |
| Yersenia_phage_phiYe03-12_gp16    | NVSAITHGIPMIND---WVN-----RGKPLRASEIKELHGMVFGKELDQLIRPGRE     | 950  |
| Prochlorococcus_phage_P-SSP7_gp16 | AIGSSVISMAALHFMNGGLTGNG-PADRQKRQAWI-----DAGYK-PRT---I----    | 930  |
| Escherichia_phage_K1E_gp36        | GIAATTIALGKQFRFTSKALR---SGDGFRRDKNLA-EVERMVGY-IGED---N----   | 779  |
| Salmonella_phage_SP6_gp37         | GVGTVLKSIPTKFLRSRAGRKGGAQGLLEPELR-EMEELIGY-IGED---N----      | 937  |
| Pseudomonas_phage_phiKMV_gp37     | GVFNVMKAMLSN-----RMGD---FVGAMRRNPDLADEMQTVLGLNLAND---I----   | 1042 |
| Shigella_phage_Sf6_gp13           | -----                                                        | 665  |
| Salmonella_phage_P22_gp16         | -----                                                        | 609  |
| Salmonella_phage_HK620_gp16       | GIV-----                                                     | 713  |
| Salmonella_phage_Epsilon_15_gp13  | GIV-----                                                     | 699  |
| Escherichia_phage_CUS-3_gp16-like | GIV-----                                                     | 710  |
|                                   |                                                              |      |
| Escherichia_phage_BA14_gp16       | DIQRLRESTDTPDLAAKVVGTIK-HTTQELAARSPFTKFLNG---TSNYILDMARQGV   | 1002 |
| Escherichia_phage_T7_gp16         | DIVQRLREATDTGPAVANIVGTLK-YSTQELAARSPWTKLLNG---TTNYLLDAARQGM  | 1005 |
| Escherichia_phage_13a_gp16        | DIVQRLREATDTGPAVANIVGTLK-YSTQELAARSPWTKLLNG---TTNYLLDAARQGM  | 1005 |
| Klebsiella_phage_K11_gp16         | DIVQRIREASDTSGAMASVGTIK-FGTQELSARSPWTKMLNG---TANYILDTARQGV   | 1007 |
| Yersenia_phage_phiYe03-12_gp16    | DHVRRLRESTDTSAAVANVVGIR-FGTQELAARSPWTKMLNG---TSNYILDAARQGV   | 1006 |
| Prochlorococcus_phage_P-SSP7_gp16 | -TIGGVQVSYSFEPFNLI-----                                      | 948  |
| Escherichia_phage_K1E_gp36        | -WLTTLKGARPDFGDDVTTVKGMMA-HFDQSMNSIRRAQTNLSLFRMAQGSLEMTNRQIA | 837  |
| Salmonella_phage_SP6_gp37         | -WLSGWNVRHDEFGETADNMGRLSAIDNGLAMGSRINTWLSGFKAIQGGSEKIVARSIN  | 996  |
| Pseudomonas_phage_phiKMV_gp37     | -RMKPWKQRQDFTFLASQDT-----FMDRFLHAGKQAVPVLNGMKFIHNWQSRMNANLTL | 1095 |
| Shigella_phage_Sf6_gp13           | -----                                                        | 665  |
| Salmonella_phage_P22_gp16         | -----ASLSGMAQE-----                                          | 609  |
| Salmonella_phage_HK620_gp16       | -----ASLSGMAQE-----                                          | 722  |
| Salmonella_phage_Epsilon_15_gp13  | -----ASLSGIAQE-----                                          | 708  |
| Escherichia_phage_CUS-3_gp16-like | -----ASLSGMAQE-----                                          | 719  |
|                                   |                                                              |      |
| Escherichia_phage_BA14_gp16       | GDVVTHAITGKGANKWIKKMLKSASISKEQWEGIQNLIRENVQTQADGKYTFKDKRKL   | 1062 |
| Escherichia_phage_T7_gp16         | GDVISATLTGKT-TRWEKEGFLRGASVTPQMGAGIKSLIKEHMMVRGEDGKFTVKDKQAF | 1064 |
| Escherichia_phage_13a_gp16        | GDVISATLTGKT-TRWEKEGFLRGASVTPQMGAGIKSLIKEHMMVRGEDGKFTVKDKQAF | 1064 |
| Klebsiella_phage_K11_gp16         | GDVAGAALGGKG-SKFGKENFLKAASISPEQWKGKIKQLFVDHATRDANGQFTIKDKKAF | 1066 |
| Yersenia_phage_phiYe03-12_gp16    | GDVAGAALAGKA-SKFGKANYLKSASISPEQWNGIKQLFRDYATRAGEDGKFTIRDKQAF | 1065 |
| Prochlorococcus_phage_P-SSP7_gp16 | -----LSTIA                                                   | 953  |
| Escherichia_phage_K1E_gp36        | LSFIDHLEGGKIIIPQ-----KKLEELGLTQEFMTNLQKHYD                   | 873  |
| Salmonella_phage_SP6_gp37         | KRLKQHLMGRELKPK-----RDLEEVLDEATMKRLKRHFD                     | 1032 |

|                                   |                                                                 |      |
|-----------------------------------|-----------------------------------------------------------------|------|
| Pseudomonas_phage_phiKMV_gp37     | NKVARAAQG-DEAAL-----RVLQQYGGKDVWDTPV---LA                       | 1126 |
| Shigella_phage_Sf6_gp13           | -----                                                           | 665  |
| Salmonella_phage_P22_gp16         | -----                                                           | 609  |
| Salmonella_phage_HK620_gp16       | -----                                                           | 722  |
| Salmonella_phage_Epsilon_15_gp13  | -----                                                           | 708  |
| Escherichia_phage_CUS-3_gp16-like | -----                                                           | 719  |
| Escherichia_phage_BA14_gp16       | NDP-----R--AMDWLRLADK-----VADETMLRPHKVSLQDSHAFG                 | 1097 |
| Escherichia_phage_T7_gp16         | MDP-----R--AMDWLRLADK-----VADEAML RPHKVSLQDSHAFG                | 1099 |
| Escherichia_phage_13a_gp16        | MDP-----R--AMDWLRLADK-----VADEAML RPHKVSLQDSHAFG                | 1099 |
| Klebsiella_phage_K11_gp16         | QDP-----R--AMDWLRLADK-----VADETMLRPHKVSLQDSHAFG                 | 1101 |
| Yersenia_phage_phiYe03-12_gp16    | NDP-----R--SMDLWRLADK-----VADETIL RPHKVSLQDSHAFG                | 1100 |
| Prochlorococcus_phage_P-SSP7_gp16 | DVG DYSQLMGE EWTE DQFQKLA----LVVAQGIS SKSYMAGIQQFVDLFGGQAGSWERI | 1008 |
| Escherichia_phage_K1E_gp36        | ANSK-----GSGLLGFDTPMPYAMG-ETLANAIRR---KSGL-IIQRNFIGDEGIWMNK     | 921  |
| Salmonella_phage_SP6_gp37         | ENPMYADYNGE KVRMMNF DAMEPDLR-EIVGVAVRR---MSGR-LIQRNFIGDEGIWMNK  | 1087 |
| Pseudomonas_phage_phiKMV_gp37     | RVRGYVTVYGRNAQSMNWGAWSQADVNTVMNTALRI---MDDS-LL-YGRVGGNSGFARS    | 1181 |
| Shigella_phage_Sf6_gp13           | -----                                                           | 665  |
| Salmonella_phage_P22_gp16         | -----                                                           | 609  |
| Salmonella_phage_HK620_gp16       | -----                                                           | 722  |
| Salmonella_phage_Epsilon_15_gp13  | -----                                                           | 708  |
| Escherichia_phage_CUS-3_gp16-like | -----                                                           | 719  |
| Escherichia_phage_BA14_gp16       | AAAKLVLFKSFVIK-----SMNAKFIRSGHEAMKNHRAMDMA-----                 | 1135 |
| Escherichia_phage_T7_gp16         | ALGKMVMQFKSFITK-----SLNSKFLRTFYDGYKNNRAIDAA-----                | 1137 |
| Escherichia_phage_13a_gp16        | ALGKMVMQFKSFITK-----SLNSKFLRTFYDGYKNNRAIDAA-----                | 1137 |
| Klebsiella_phage_K11_gp16         | AGVKMAMQFKNFITK-----SLNAKFIRSFYEGYKNNRAIDMA-----                | 1139 |
| Yersenia_phage_phiYe03-12_gp16    | AGVKMVMQFKNFVIK-----SLNSRFVRSFYEATKNNRALDQA-----                | 1138 |
| Prochlorococcus_phage_P-SSP7_gp16 | ISGLINNIGLPLSSLRNELGKVFNP HMKELNSGIIIESIRNRNLISEGLAINELPTKYDMLN | 1068 |
| Escherichia_phage_K1E_gp36        | ALGKTFAQLKSFSLV-----SGEK---QFGRGIRH-----DKIG                    | 952  |
| Salmonella_phage_SP6_gp37         | WWGKALTQFKSFSTIV-----SIEK---QLIHDLRG-----DKIQ                   | 1118 |
| Pseudomonas_phage_phiKMV_gp37     | PVGQILGQFRSFVAF-----AHNK---LLRGTYEN-----SGVLG                   | 1213 |
| Shigella_phage_Sf6_gp13           | -----                                                           | 665  |
| Salmonella_phage_P22_gp16         | -----                                                           | 609  |
| Salmonella_phage_HK620_gp16       | -----                                                           | 722  |
| Salmonella_phage_Epsilon_15_gp13  | -----                                                           | 708  |
| Escherichia_phage_CUS-3_gp16-like | -----                                                           | 719  |
| Escherichia_phage_BA14_gp16       | LTYAISGGIAGSYVVAQAHKKAAGLPKEQQKDYLLKKALDPKMIAYAAASRSSHLGSPLSI   | 1195 |
| Escherichia_phage_T7_gp16         | LSIITSMGLAGGFYAMAAHV KAYALPKEKRKEYLERALDPTMIAHAALSRSSQLGAPLAM   | 1197 |
| Escherichia_phage_13a_gp16        | MSIVTSMGLAGGFYAMAVHV KAYALPKEKRKEYLERALDPTMIAHAALSRSSHLGAPLAM   | 1197 |
| Klebsiella_phage_K11_gp16         | LTHVLSLGIAGTYFAMQAHVKAYGLQESQRKDYLLKKALNPTMLGYAALTRSSHTGAPLSI   | 1199 |
| Yersenia_phage_phiYe03-12_gp16    | LTHIISLGLAGGYVVGQAHLKAASLQEHKRKEYLKNALDPKMIAHASISRSSHLGSPLSI    | 1198 |
| Prochlorococcus_phage_P-SSP7_gp16 | GRPIKDWDFPTRMFNMFS PFYVNLQDSEGRKLLFNSGYDLRMSTYSSPDGID-LSDNARL   | 1127 |
| Escherichia_phage_K1E_gp36        | LAKKTAYGFALGSIVYAAKAYVNSIGREDQDEYLEEKLSPKG-----LA-----          | 996  |
| Salmonella_phage_SP6_gp37         | AAQIMAWSSLLGFASYATQM QMAIGREDRDKFLREKFDTON-----IA-----          | 1162 |
| Pseudomonas_phage_phiKMV_gp37     | VASLLAFQYPLTALMMGAKAAI-----NGKFDTS-----EGIR-----                | 1247 |
| Shigella_phage_Sf6_gp13           | -----                                                           | 665  |
| Salmonella_phage_P22_gp16         | -----                                                           | 609  |
| Salmonella_phage_HK620_gp16       | -----                                                           | 722  |
| Salmonella_phage_Epsilon_15_gp13  | -----                                                           | 708  |
| Escherichia_phage_CUS-3_gp16-like | -----                                                           | 719  |
| Escherichia_phage_BA14_gp16       | ANFAMGAAGYDQG-----                                              | 1208 |
| Escherichia_phage_T7_gp16         | VDLVGGVLGFESS-----                                              | 1210 |
| Escherichia_phage_13a_gp16        | ADLVGGALGFESS-----                                              | 1210 |
| Klebsiella_phage_K11_gp16         | VSMMAGAAGFQDA-----                                              | 1212 |
| Yersenia_phage_phiYe03-12_gp16    | YDMFAGMVGSDTY-----                                              | 1211 |
| Prochlorococcus_phage_P-SSP7_gp16 | RSLYMKAIGDQNL EAKLNKLAKNP KVIASIEKMQADLRAGKKEINPRTAYVHNKMIHTLF  | 1187 |
| Escherichia_phage_K1E_gp36        | ----FGAMG-----MMSTTAV                                           | 1008 |
| Salmonella_phage_SP6_gp37         | ----MGVFN-----KL PQVAG                                          | 1174 |
| Pseudomonas_phage_phiKMV_gp37     | ----KMAID-----GIGYTAG                                           | 1259 |
| Shigella_phage_Sf6_gp13           | -----                                                           | 665  |
| Salmonella_phage_P22_gp16         | -----                                                           | 609  |
| Salmonella_phage_HK620_gp16       | -----                                                           | 722  |
| Salmonella_phage_Epsilon_15_gp13  | -----                                                           | 708  |
| Escherichia_phage_CUS-3_gp16-like | -----                                                           | 719  |
| Escherichia_phage_BA14_gp16       | -----LMVRSTILPKGDDK-RDRNKAVTSRDMGDSIMGAIGE QVPALGFAGATLAAGR N   | 1261 |
| Escherichia_phage_T7_gp16         | -----KMARSTILPKD TVKERDPNKP YTSREVVMGAMGSNLL EQMPSAGFVANVGATLMN | 1264 |
| Escherichia_phage_13a_gp16        | -----KMARSTILPKD TTKERDPNKP YTSREVVMGAMGSNLL EQMPSAGFVANVGATLMN | 1264 |
| Klebsiella_phage_K11_gp16         | -----NMLRSTILPKEEQF-QKKD GASKGRAESSNLAGNLGSQVPALGVYGNVIATAKN    | 1265 |
| Yersenia_phage_phiYe03-12_gp16    | -----KYTRSTVLPKESEK-RDPNKA MTGRQVASTIAGAVGEQVPG LGFVGSVGATATN   | 1264 |
| Prochlorococcus_phage_P-SSP7_gp16 | MEARKIAWAKVRNDPEALQL-----YAEDKRINIQN-----ETS-----               | 1221 |
| Escherichia_phage_K1E_gp36        | FSLGGDFLGG LGVLPSLVLQ-----S--RYEAGFQT KGLIDQIPLVGVGQDA-----     | 1053 |
| Salmonella_phage_SP6_gp37         | FGLAGDTFATFGLMPDSMMQ-----A--PGRMGFRQQGFGDLVAGAGVISDA-----       | 1219 |
| Pseudomonas_phage_phiKMV_gp37     | LGFTADMWGVVT--GH-----SRMSA-----PVFGLAEHS-----                   | 1287 |
| Shigella_phage_Sf6_gp13           | -----                                                           | 665  |
| Salmonella_phage_P22_gp16         | -----                                                           | 609  |
| Salmonella_phage_HK620_gp16       | -----                                                           | 722  |
| Salmonella_phage_Epsilon_15_gp13  | -----                                                           | 708  |

|                                   |                                                              |      |
|-----------------------------------|--------------------------------------------------------------|------|
| Escherichia_phage_CUS-3_gp16-like | -----                                                        | 719  |
| Escherichia_phage_BA14_gp16       | AYGVLTAPNKPTER---EMMTGLMNAHREMIPNDP---ISQQMLIKFYANGVHIKADK   | 1314 |
| Escherichia_phage_T7_gp16         | AAGVVNSPNKATEQ---DFMTGLMNSTKELVPNDP---LTQQLVLKIYEANGVNLRRER  | 1317 |
| Escherichia_phage_13a_gp16        | AAGVVNSPNKATEQ---DFMTGLMNSTKELVPNDP---LTQQLVLKIYEANGVNLRRER  | 1317 |
| Klebsiella_phage_K11_gp16         | AYGVATAPNKPTER---DYMTGLMNSTKELVPNDP---LTQQLIMKIYEANGVTIKQQP  | 1318 |
| Yersenia_phage_phiYe03-12_gp16    | AASLLSSPNKATAL---EFRTGLFNSTRELIPNDP---LSQQLIMKIYEANGIRIKETP  | 1317 |
| Prochlorococcus_phage_P-SSP7_gp16 | ---LNTTRNYTNQNAES-----NPSNLLLPYR-----                        | 1245 |
| Escherichia_phage_K1E_gp36        | -YRLADSITKYAEGDTE-G--VDVARRALRLVPLTNVIGIQNALRYG-----LDELED-  | 1102 |
| Salmonella_phage_SP6_gp37         | -VNLSQALVKYANGDDD-VSTRQLVDKVRRLVPLANTIGVGQMTKAS-----VDLLED-  | 1270 |
| Pseudomonas_phage_phiKMV_gp37     | -NEVFRGVKDLVTGDDPAAATGDIVSGAAGALPFVNVFPATKL LLES-----IKGE--- | 1337 |
| Shigella_phage_Sf6_gp13           | -----                                                        | 665  |
| Salmonella_phage_P22_gp16         | -----                                                        | 609  |
| Salmonella_phage_HK620_gp16       | -----                                                        | 722  |
| Salmonella_phage_Epsilon_15_gp13  | -----                                                        | 708  |
| Escherichia_phage_CUS-3_gp16-like | -----                                                        | 719  |
| Escherichia_phage_BA14_gp16       | K--                                                          | 1315 |
| Escherichia_phage_T7_gp16         | K--                                                          | 1318 |
| Escherichia_phage_13a_gp16        | K--                                                          | 1318 |
| Klebsiella_phage_K11_gp16         | KPN                                                          | 1321 |
| Yersenia_phage_phiYe03-12_gp16    | KKQ                                                          | 1320 |
| Prochlorococcus_phage_P-SSP7_gp16 | ---                                                          | 1245 |
| Escherichia_phage_K1E_gp36        | ---                                                          | 1102 |
| Salmonella_phage_SP6_gp37         | ---                                                          | 1270 |
| Pseudomonas_phage_phiKMV_gp37     | ---                                                          | 1337 |
| Shigella_phage_Sf6_gp13           | ---                                                          | 665  |
| Salmonella_phage_P22_gp16         | ---                                                          | 609  |
| Salmonella_phage_HK620_gp16       | ---                                                          | 722  |
| Salmonella_phage_Epsilon_15_gp13  | ---                                                          | 708  |
| Escherichia_phage_CUS-3_gp16-like | ---                                                          | 719  |
